# Supplementary material for: Deciphering the positional impact of chlorine in a new series of berberine analogues towards the superb-selective “turn-on” hydrophobic signaling of bovine serum albumin at physiological pH
Source: Royal Society of Chemistry journal article supplement (doi:10.1039/c9nj05642d), 2019-12-27
Supplement: c9nj05642d1.pdf [file c9nj05642d1.pdf]

**Deciphering the positional impact of chlorine in new series of berberine analogues towards superb-selective “turn-on” hydrophobic signaling of bovine serum albumin at physiological pH**

Gopal Chandra Jana<sup>a</sup>, Sk. Nayim<sup>a</sup>, Nandan Kumar Sahoo<sup>a</sup>, Somnath Das<sup>a</sup>, Mt. Nasima Aktara<sup>a</sup>, Anirudha Patra <sup>a</sup>, Md. Maidul Islam<sup>b</sup>, and Maidul Hossain\*<sup>a</sup>

<sup>a</sup> Department of Chemistry and Chemical Technology, Vidyasagar University, Midnapore, 721102, West Bengal, India.

<sup>b</sup> Department of Chemistry, Aliah University, Kolkata, West Bengal, India.

\*Corresponding author: Dr. Maidul Hossain\*<sup>a</sup>, Assistant Professor, Department of Chemistry and Chemical Technology, Vidyasagar University, Midnapore, 721102, West Bengal, India. Mobile no: 9432976277. Email address: [hossainm@mail.vidyasagar.ac.in](mailto:hossainm@mail.vidyasagar.ac.in)

### **Anisotropy (r) calculation:**

The steady state anisotropy (r) of various synthesized analogue were calculated in absence and in presence of BSA by the equation given below <sup>45</sup>

$$r = \frac{I_{VV} - GI_{VH}}{I_{VV} + 2GI_{VH}}$$

(1)

where,  $I_{VV}$  is the emission intensity when excitation and emission polariser are vertically oriented,  $I_{VH}$  is the emission intensity when excitation and emission polariser are horizontally oriented and G, the instrumental grating factor is described as <sup>45</sup>

$$G = \frac{I_{HV}}{I_{HH}} \quad (2)$$

**Calculation of non-radiative decay rate constant ( $k_{nr}$ ):** The non-radiative rate constant of berberine analogue in absence and in presence of BSA was calculated by subsequent equation<sup>3</sup>

$$k_{nr} = k_r \left[ \frac{1}{\Phi} - 1 \right] \quad (3)$$

Where  $k_r$  is the radiative rate constant and is the quantum yield of the synthesized analogue.

The radiative rate constant is described as

$$k_r = \frac{\Phi_f}{\tau_f} \quad (4)$$

Here,  $\tau_f$  and  $\Phi_f$  signifies lifetime and quantum yield of the compound respectively.

**Calculation of change in free energy ( $\Delta G$ ):** The change in Gibbs free energy during the adduct formation between the probes and BSA was measured by subsequent equation <sup>3</sup>

$$\Delta G = -2.303RT \log K_a$$

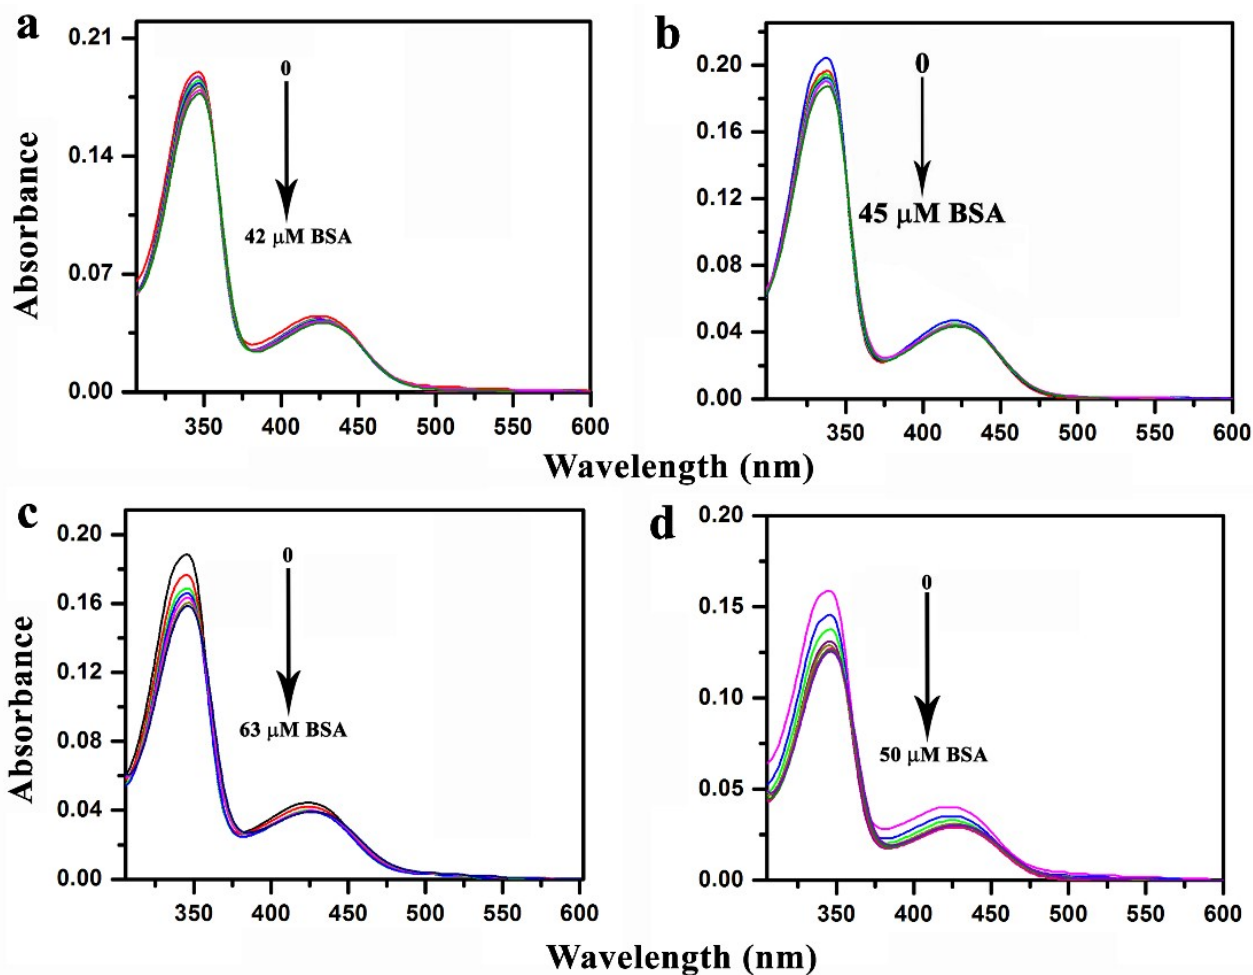

**Fig. S1** Absorption spectra of berberine analogues (5  $\mu\text{M}$ ) with increasing concentrations of BSA in CP buffer of pH 7.1, (a) BZ<sub>1</sub>, (b) BZ<sub>2</sub>, (c) BZ<sub>3</sub>, (d) BZ<sub>5</sub>.

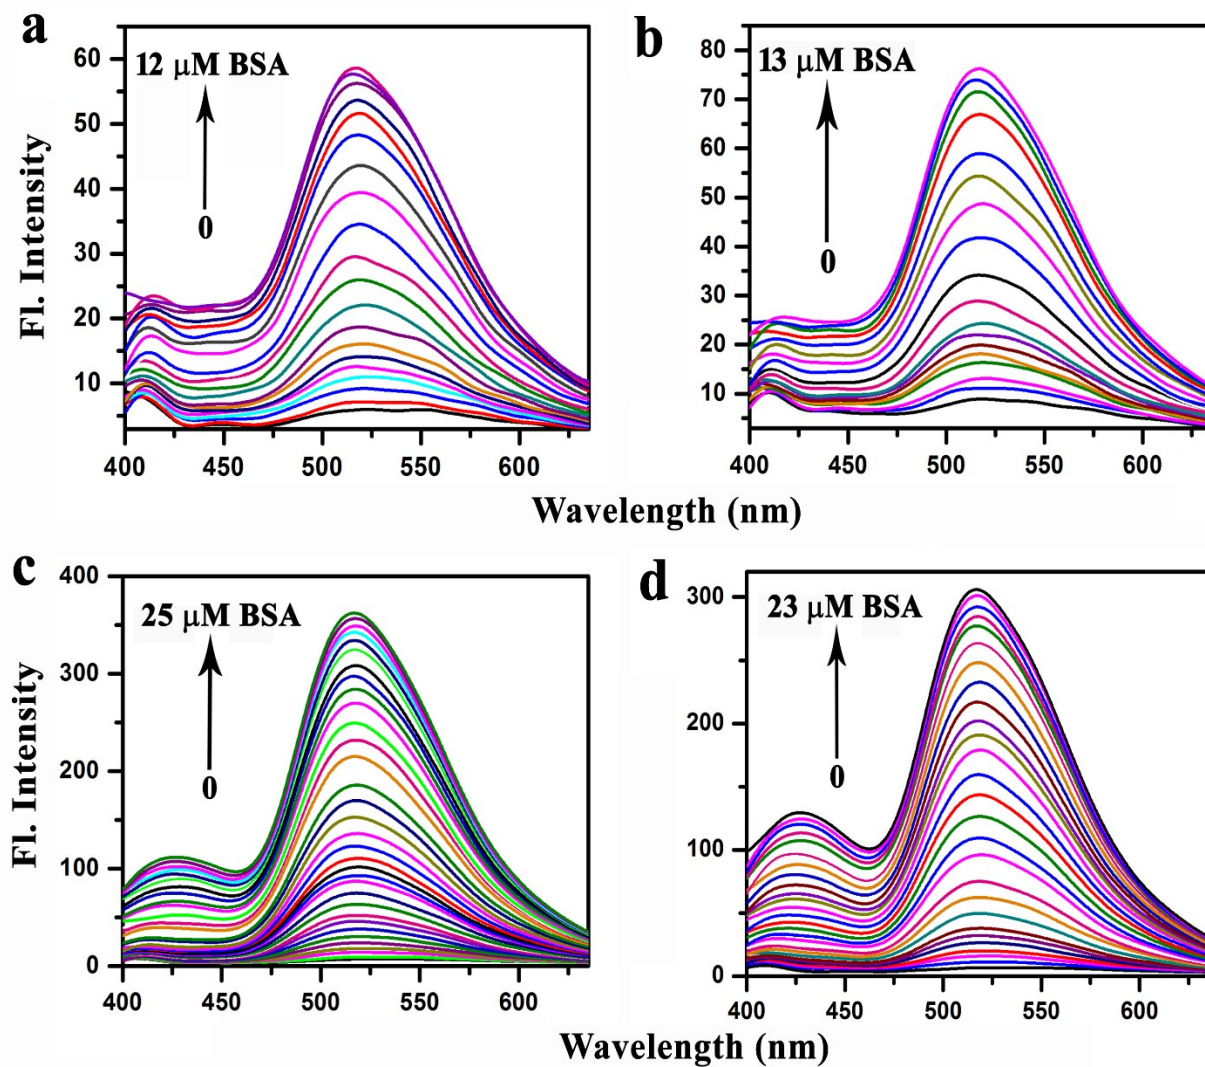

**Fig. S2** Fluorescence titration spectra of Synthesized berberine analogues ( $5 \mu\text{M}$ ), (a)  $\text{BZ}_1$ , (b)  $\text{BZ}_2$ , (c)  $\text{BZ}_3$ , (d)  $\text{BZ}_5$  with increasing concentration of BSA up to saturation in CP buffer solution (pH 7.2, 10 mM).

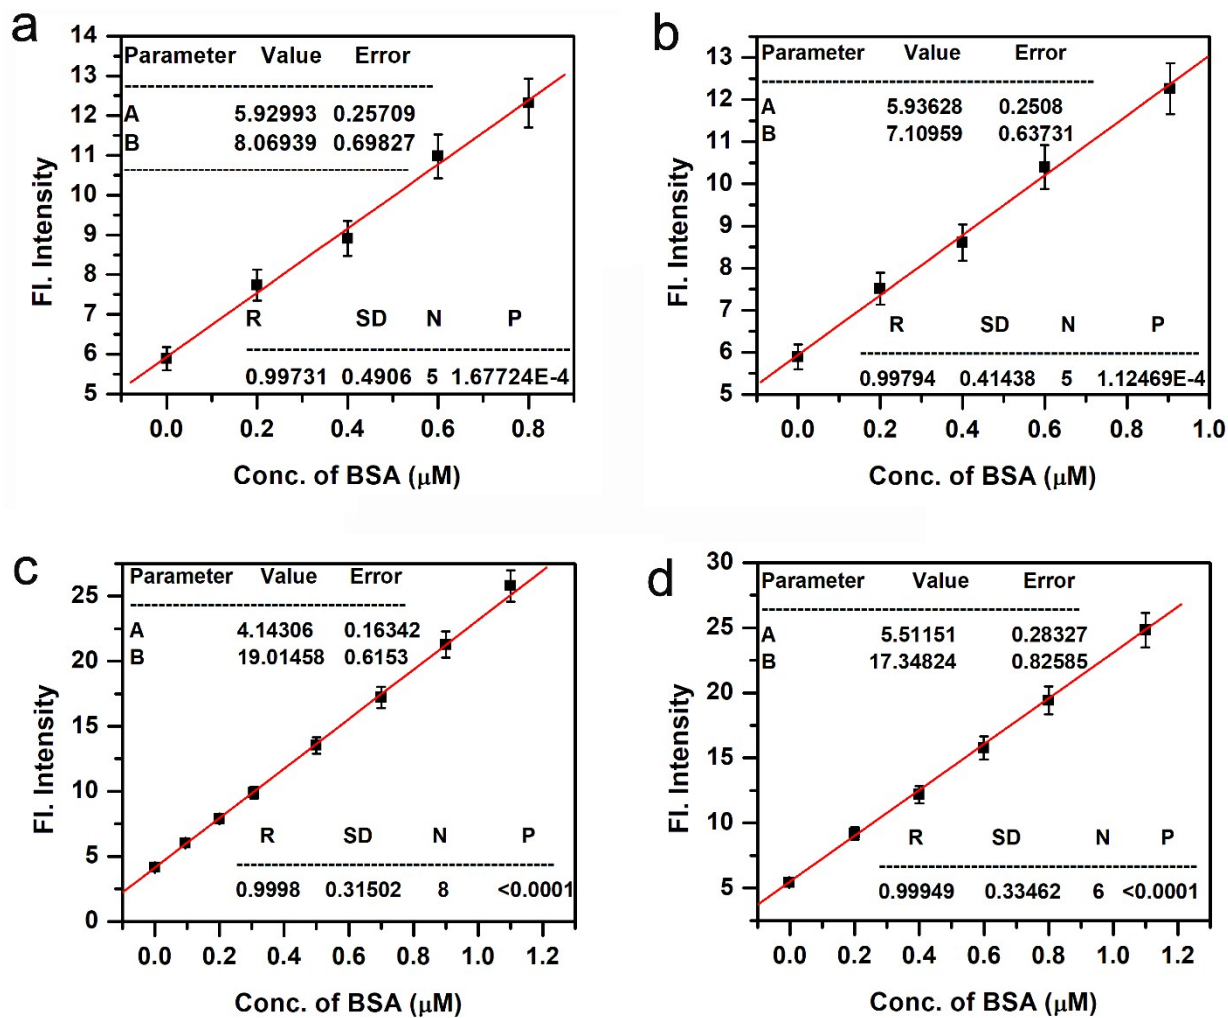

**Fig. S3** The plot of fluorescence intensity of analogues with respect to addition of BSA in the linearity range, (a) BZ<sub>1</sub>, (b) BZ<sub>2</sub>, (c) BZ<sub>3</sub> and (d) BZ<sub>5</sub>.

| Entry           | $K_{BH}$          |
|-----------------|-------------------|
| BZ <sub>1</sub> | $2.5 \times 10^4$ |
| BZ <sub>2</sub> | $3.1 \times 10^4$ |
| BZ <sub>3</sub> | $6.8 \times 10^4$ |
| BZ <sub>4</sub> | $7.3 \times 10^4$ |
| BZ <sub>5</sub> | $5.7 \times 10^4$ |

| Berberine analogues | Linearity range ( $\mu\text{M}$ ) | LOD ( $\mu\text{M}$ ) |
|---------------------|-----------------------------------|-----------------------|
| BZ <sub>1</sub>     | 0 –0.8                            | 0.200                 |
| BZ <sub>2</sub>     | 0 –0.9                            | 0.192                 |
| BZ <sub>3</sub>     | 0 –1.1                            | 0.054                 |
| BZ <sub>5</sub>     | 0 –1.1                            | 0.063                 |

| Probe                                   | Solvent system                   | Method       | Linear range             | LOD                | Reference |
|-----------------------------------------|----------------------------------|--------------|--------------------------|--------------------|-----------|
| Dansylamide substituted probe (DNSA-SQ) | Phosphate buffer (10 mM, pH 7.2) | Fluorometric | 0.5 – 3 equiv            | 1 $\mu\text{g/ml}$ | 33        |
| Graphene oxide based biosensor          | .....                            | Fluorometric | 0 –60 $\mu\text{g/ml}$   | 0.4 $\mu\text{M}$  | 28        |
| Hydroxylated carbazole                  | PBS (pH 7.4, 10X)                | Fluorometric | 0 –1 $\mu\text{M}$       | 5 nM               | 3         |
| 5-(alkoxy) naphthalene                  | Aqueous buffer (pH 7.0)          | Fluorometric | 0 – 275 $\mu\text{g/ml}$ | ....               | 45        |
| BDAZn-GO                                | Water-ethanol (1:1)              | Fluorometric | 0.714 – 1.25 mg/ml       | 0.0715 mg/ml       | 30        |
| FPI based NIR probe                     | PBS buffer+ DMSO                 | Fluorometric | 0-4 $\mu\text{M}$        | 30 nM              | 31        |
| Berberine analogue (BZ <sub>4</sub> )   | CP buffer                        | Fluorometric | 0– 2.5 $\mu\text{M}$     | 3.3 nM             | This work |

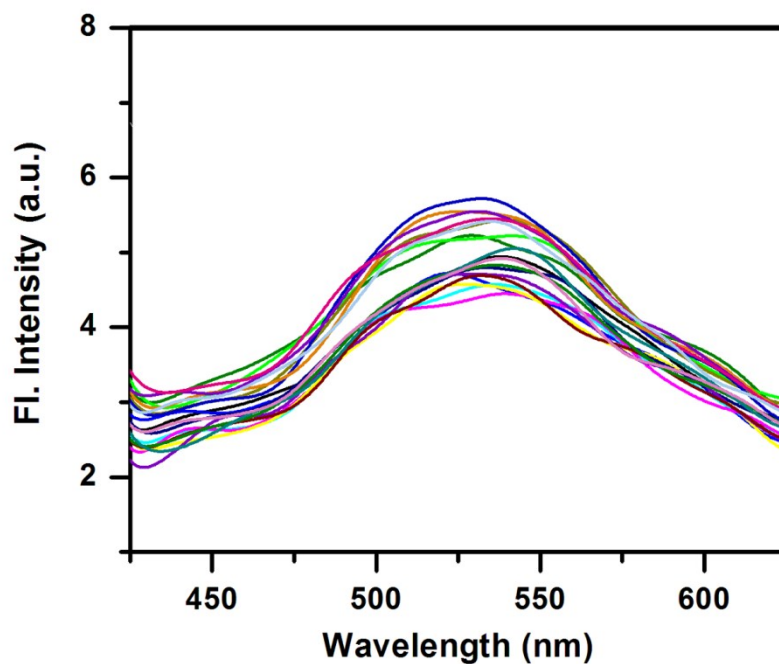

**Fig. S4** Emission spectra of BZ<sub>4</sub> (5 μM) recorded in the presence of various anions, F<sup>-</sup> Cl<sup>-</sup>, Br<sup>-</sup>, I<sup>-</sup>, CO<sub>3</sub><sup>2-</sup>, SO<sub>4</sub><sup>2-</sup>, HPO<sub>4</sub><sup>2-</sup>, SCN<sup>-</sup>, CO<sub>3</sub><sup>2-</sup>, BO<sub>3</sub><sup>3-</sup>, NO<sub>2</sub><sup>-</sup>, NO<sub>3</sub><sup>-</sup>, S<sup>2-</sup>, HCO<sub>3</sub><sup>-</sup>, HPO<sub>4</sub><sup>-</sup>, SO<sub>3</sub><sup>2-</sup>, B<sub>4</sub>O<sub>7</sub><sup>2-</sup>, S<sub>2</sub>O<sub>3</sub><sup>2-</sup>).

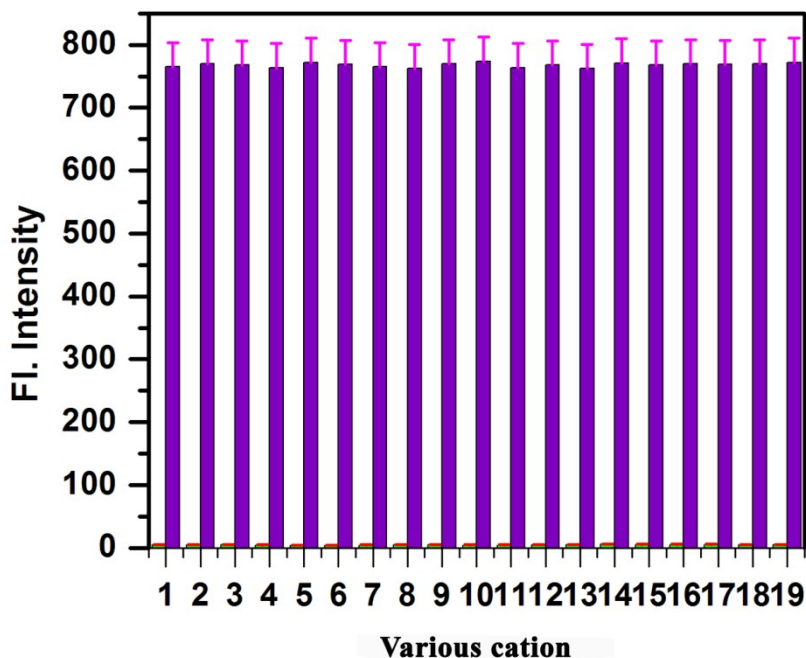

**Fig. S5** Interfering effects to various anions in CP buffer (10 mM, pH 7.2). The green bars represent the intensity of BZ<sub>4</sub> in the presence of anions (each of 28 μM). The violet bars signify the changes of the ratios that occurs upon the consequent addition of 28 μM of BSA to the above solution.

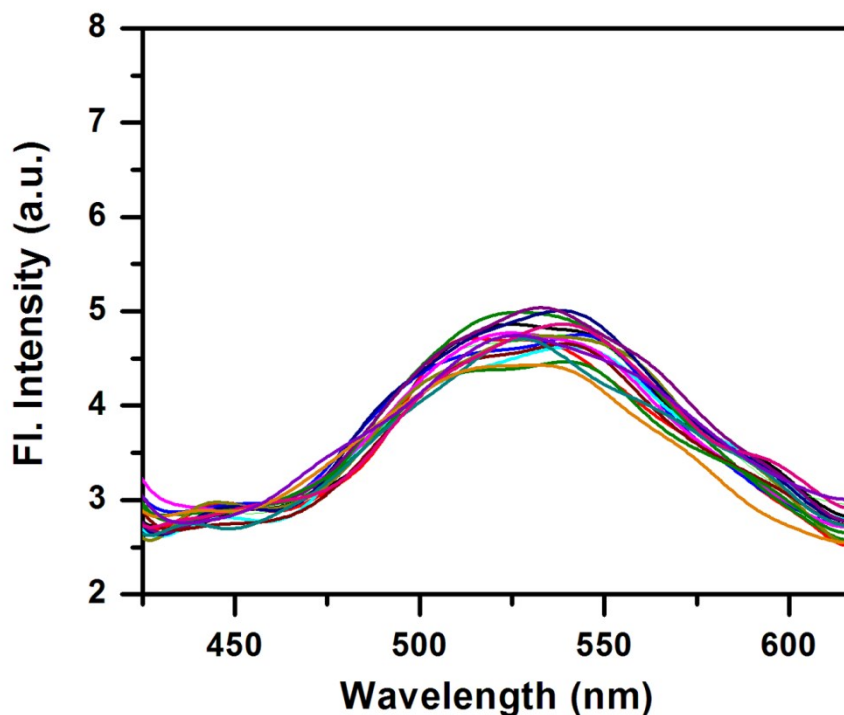

**Fig. S6** Emission spectra of BZ<sub>4</sub> (5 μM) recorded in the presence of various cations (28 μM each, Na<sup>+</sup>, K<sup>+</sup>, Au<sup>+</sup>, Ag<sup>+</sup>, Ni<sup>2+</sup>, Mg<sup>2+</sup>, Ca<sup>2+</sup>, Cu<sup>2+</sup>, Cd<sup>2+</sup>, Hg<sup>2+</sup>, Pb<sup>2+</sup>, Fe<sup>2+</sup>, Al<sup>3+</sup>, Zn<sup>2+</sup>, Sr<sup>2+</sup>).

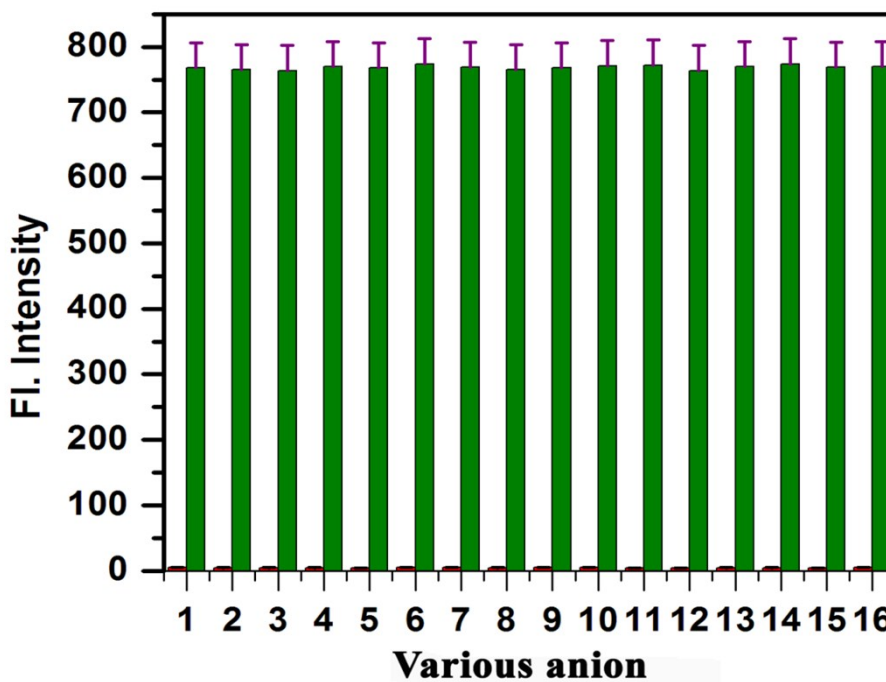

**Fig. S7** Interfering effects to various anions in CP buffer (10 mM, pH = 7.2). The green bars represent the intensity of BZ<sub>4</sub> in the presence of cations (each of 28 μM). The green bars signify the changes of the ratios that occurs upon the consequent addition of 28 μM of BSA to the above solution.



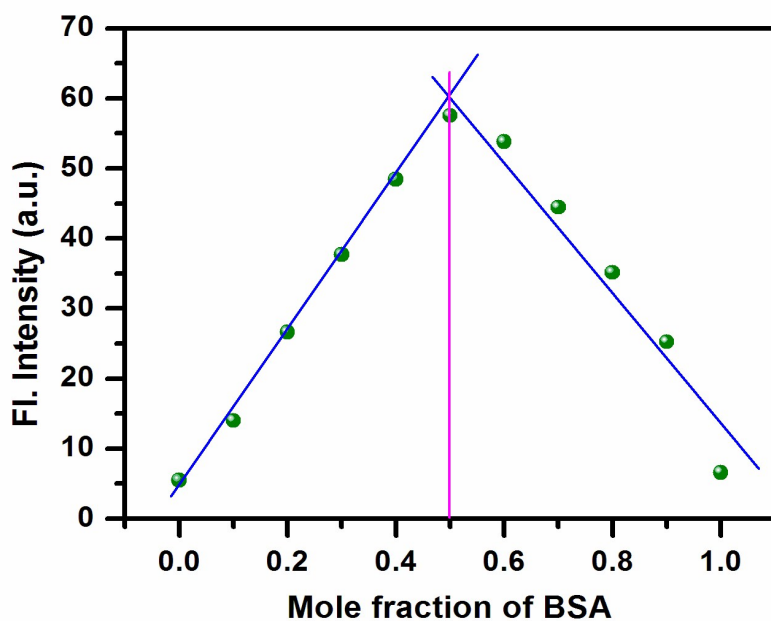

**Fig. S8** The emission intensity of the solution containing BZ<sub>4</sub> and BSA varying concentration of both but keeping total concentration 5  $\mu$ M.

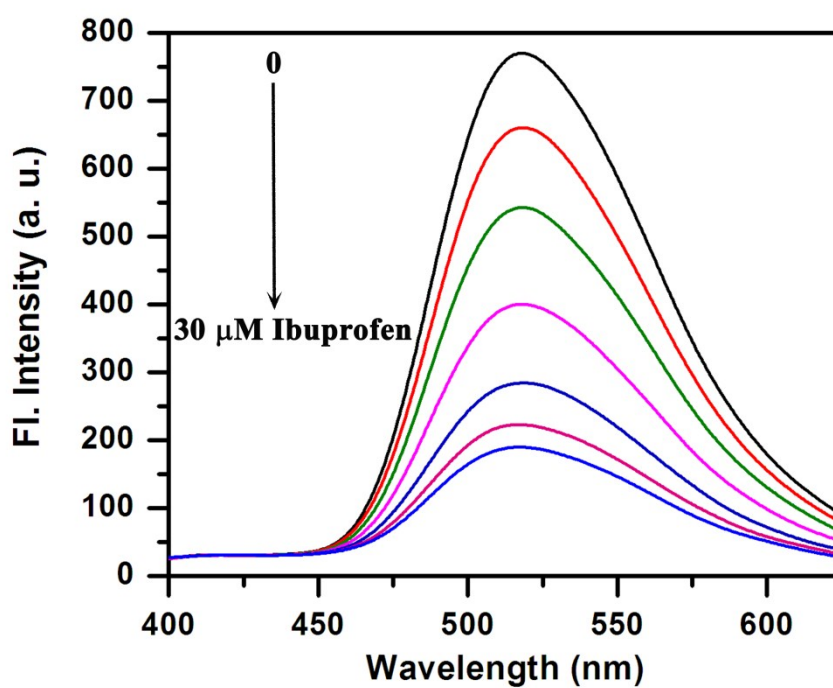

**Fig. S9** The variation of fluorescence intensity of BZ<sub>4</sub> + BSA (5 μM + 28 μM) upon addition of site marker, ibuprofen.

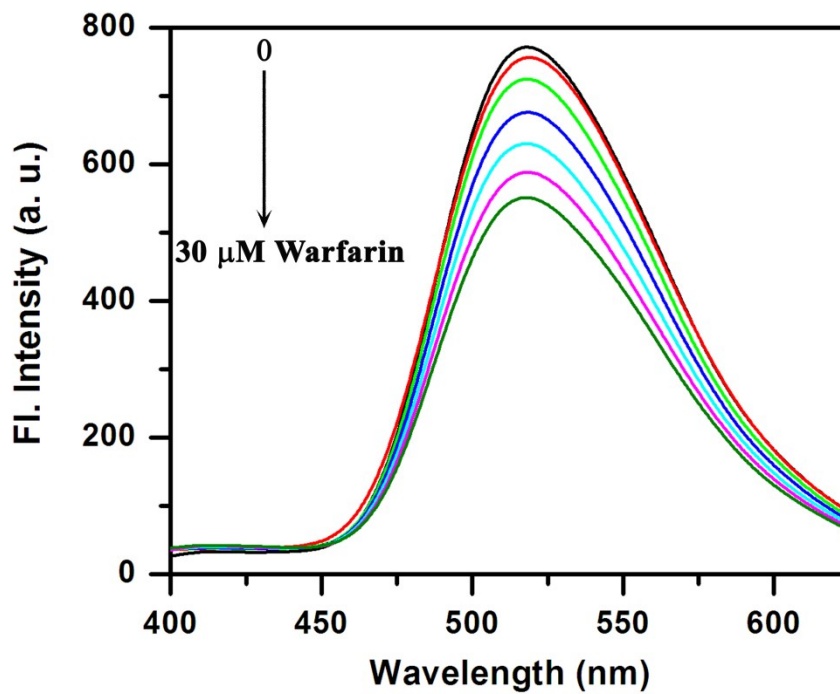

**Fig. S10** The variation of fluorescence intensity of BZ<sub>4</sub> + BSA (5 μM + 28 μM) upon addition of site marker, warfarin.

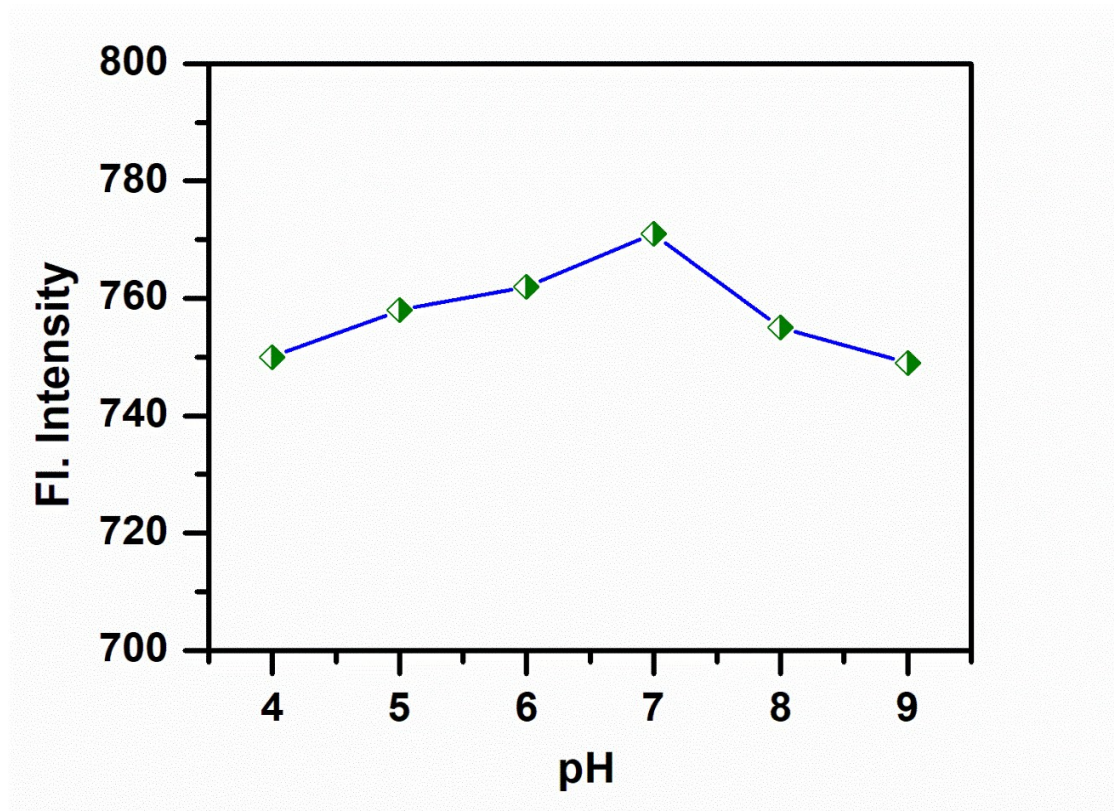

**Fig. S11** The effect of pH on interaction of BZ4 with BSA, where BZ<sub>4</sub>+BSA (5  $\mu$ M+28  $\mu$ M).

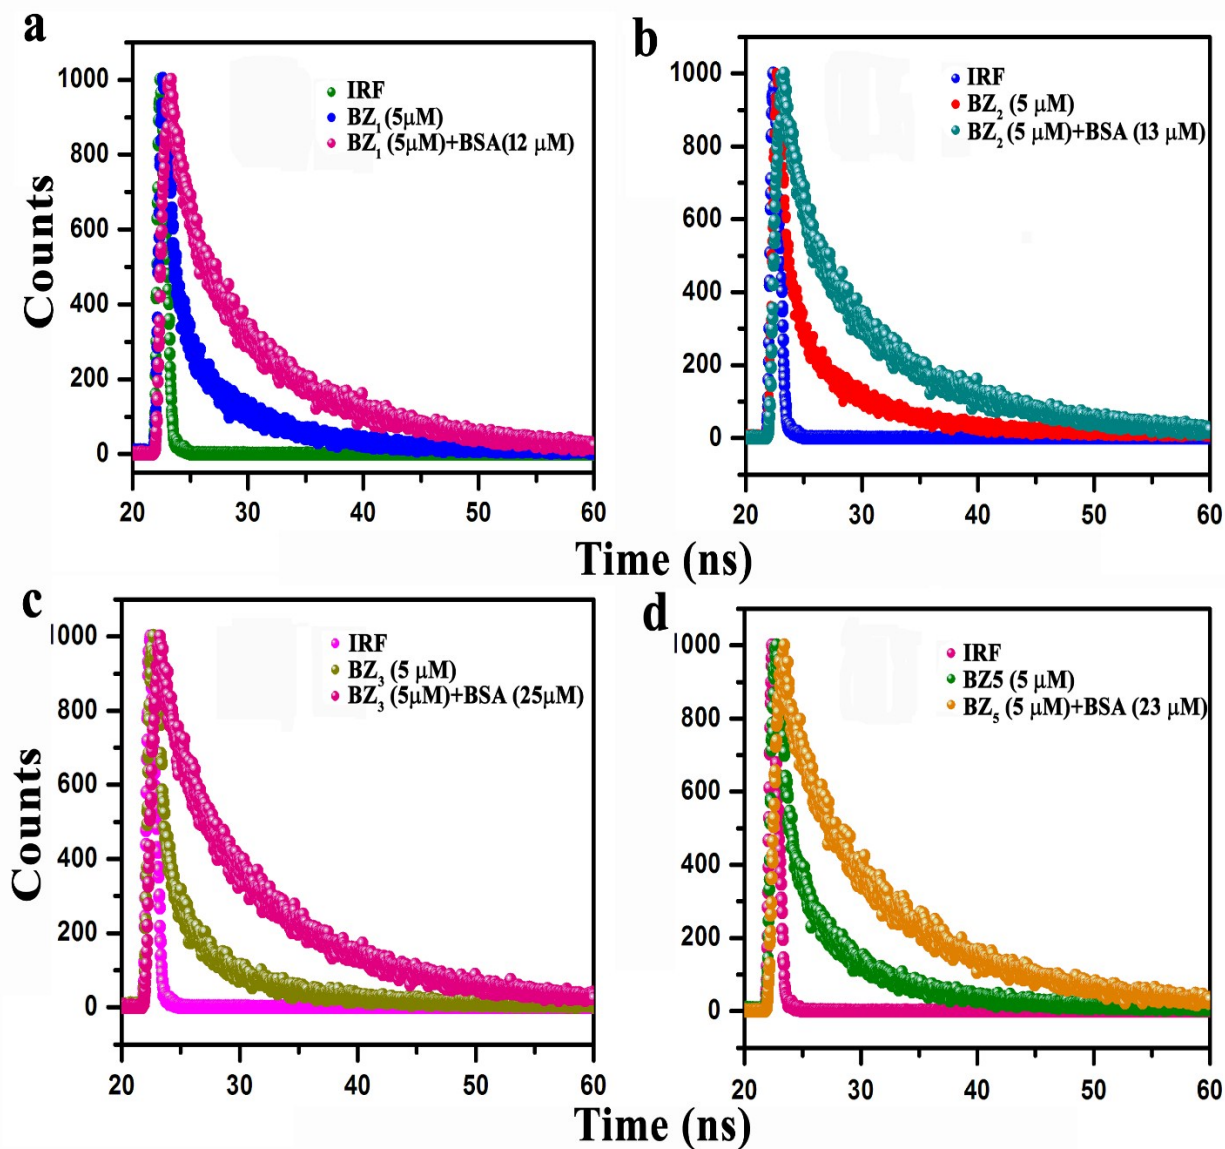

**Fig. S12** Time resolved fluorescence spectra of the compounds (a) BZ<sub>1</sub>, (b) BZ<sub>2</sub>, (c) BZ<sub>3</sub> and (d) BZ<sub>5</sub> (5 μM) in absence and in presence of BSA in CP buffer (pH 7.2, 10mM).

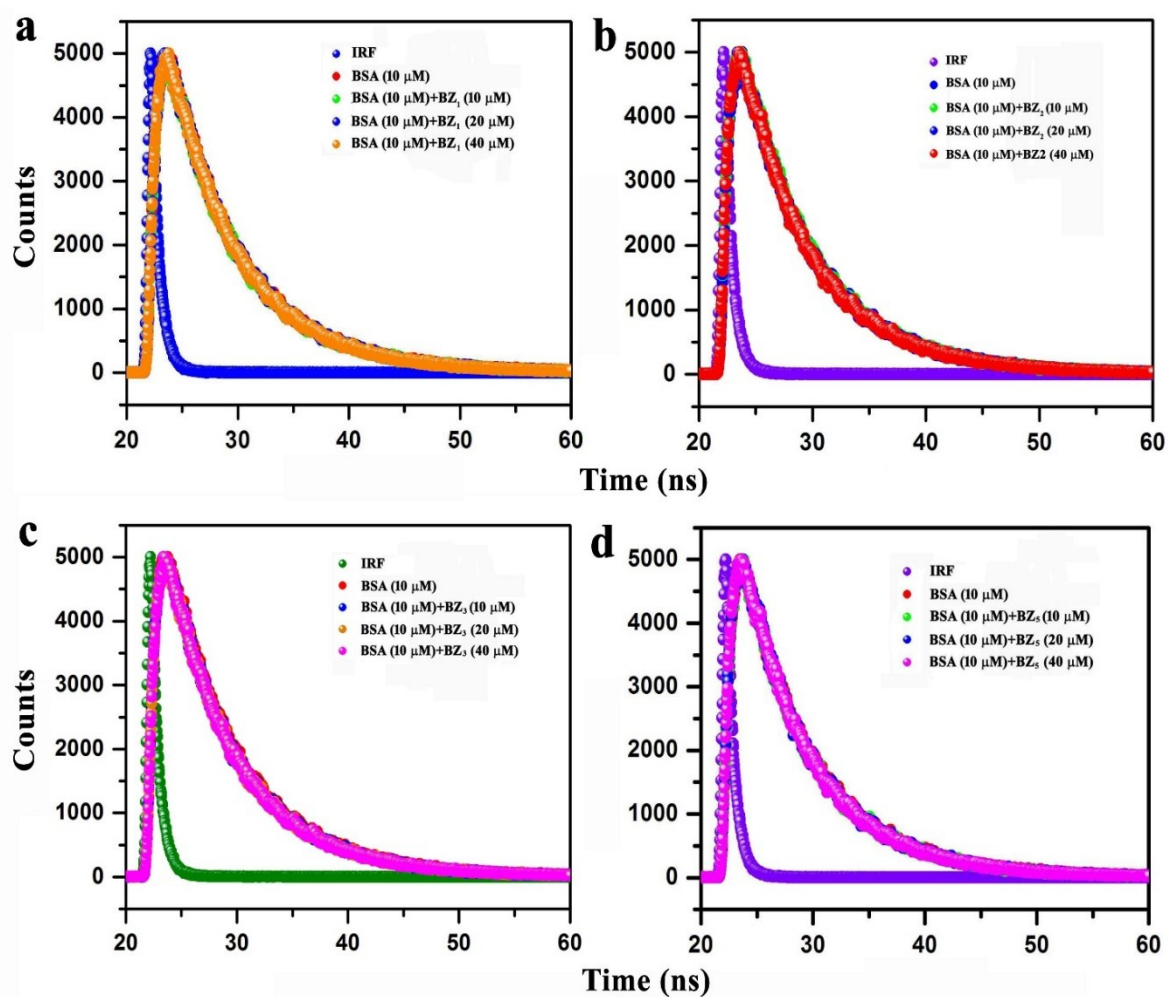

**Fig. S13** Lifetime decay profile of BSA (10 μM) in presence of different concentration of probes, (a) BZ<sub>1</sub>, (b) BZ<sub>2</sub>, (c) BZ<sub>3</sub> and (d) BZ<sub>5</sub>.

**Table: S4 Lifetime of BSA in presence of synthesized analogues.**

| Entry                               | $\tau_1$ (ns) | $\alpha_1$ | $\tau_2$ (ns) | $\alpha_2$ | $\tau_3$ (ns) | $\alpha_3$ | $\tau_m$ | $\chi^2$ |
|-------------------------------------|---------------|------------|---------------|------------|---------------|------------|----------|----------|
| Native BSA                          | 2.03          | 0.09       | 4.79          | 0.45       | 7.66          | 0.46       | 5.86     | 1.04     |
|                                     |               |            |               |            |               |            |          |          |
| BSA + 10 $\mu$ M<br>BZ <sub>1</sub> | 3.64          | 0.28       | 7.14          | 0.67       | 8.54          | 0.05       | 6.23     | 1.07     |
| BSA + 20 $\mu$ M<br>BZ <sub>1</sub> | 2.86          | 0.18       | 6.56          | 0.81       | 20.9          | 0.01       | 6.03     | 1.08     |
| BSA + 40 $\mu$ M<br>BZ <sub>1</sub> | 3.19          | 0.23       | 6.72          | 0.77       | -             | -          | 5.90     | 1.09     |
|                                     |               |            |               |            |               |            |          |          |
| BSA + 10 $\mu$ M<br>BZ <sub>2</sub> | 2.88          | 0.17       | 5.6           | 0.42       | 7.42          | 0.41       | 5.88     | 1.05     |
| BSA + 20 $\mu$ M<br>BZ <sub>2</sub> | 2.51          | 0.15       | 6.17          | 0.78       | 10.2          | 0.07       | 5.90     | 1.02     |
| BSA + 40 $\mu$ M<br>BZ <sub>2</sub> | 1.22          | 0.03       | 3.54          | 0.28       | 6.88          | 0.69       | 5.77     | 1.03     |
|                                     |               |            |               |            |               |            |          |          |
| BSA + 10 $\mu$ M<br>BZ <sub>3</sub> | 3.38          | 0.30       | 6.92          | 0.70       | -             | -          | 5.85     | 1.05     |
| BSA + 20 $\mu$ M<br>BZ <sub>3</sub> | 3.14          | 0.28       | 6.88          | 0.72       | -             | -          | 5.83     | 1.01     |
| BSA + 40 $\mu$ M<br>BZ <sub>3</sub> | 3.59          | 0.34       | 7.03          | 0.66       | -             | -          | 5.86     | 1.09     |
|                                     |               |            |               |            |               |            |          |          |
| BSA + 10 $\mu$ M<br>BZ <sub>4</sub> | 1.2           | 0.07       | 3.71          | 0.29       | 7.06          | 0.64       | 5.67     | 1.04     |
| BSA + 20 $\mu$ M<br>BZ <sub>4</sub> | 1.32          | 0.11       | 5.04          | 0.57       | 8.13          | 0.32       | 5.62     | 1.03     |
| BSA + 40 $\mu$ M<br>BZ <sub>4</sub> | 1.13          | 0.11       | 4.26          | 0.36       | 7.23          | 0.53       | 5.48     | 1.05     |
|                                     |               |            |               |            |               |            |          |          |
| BSA + 10 $\mu$ M<br>BZ <sub>5</sub> | 2.15          | 0.12       | 5.42          | 0.59       | 8.13          | 0.29       | 5.81     | 1.02     |
| BSA + 20 $\mu$ M<br>BZ <sub>5</sub> | 1.8           | 0.10       | 5.15          | 0.55       | 7.88          | 0.35       | 5.77     | 1.05     |
| BSA + 40 $\mu$ M<br>BZ <sub>5</sub> | 1.32          | 0.06       | 3.63          | 0.28       | 6.88          | 0.67       | 5.70     | 1.06     |

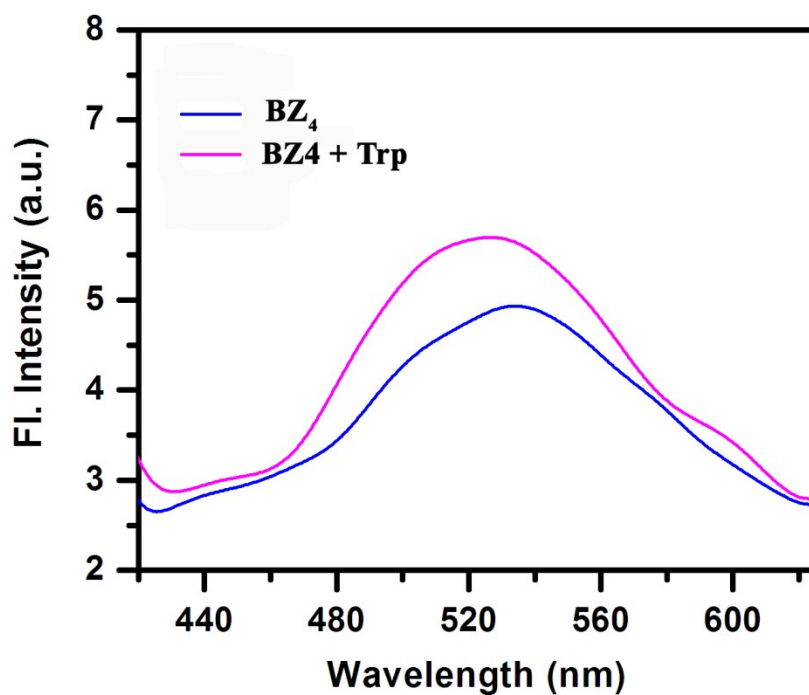

**Fig. S14** The fluorescence response of BZ<sub>4</sub> (5  $\mu$ M) upon addition of 28  $\mu$ M tryptophan solution

| <b>Table: S5</b> 3D fluorescence spectral data analysis |                                      |                                                                     |           |                                      |                                                                        |           |
|---------------------------------------------------------|--------------------------------------|---------------------------------------------------------------------|-----------|--------------------------------------|------------------------------------------------------------------------|-----------|
| Entry                                                   | Peak1( $\lambda_{ex}/\lambda_{em}$ ) | Stokes shift<br>( $\Delta\lambda=\lambda_{em}$<br>$-\lambda_{ex}$ ) | Intensity | Peak2( $\lambda_{ex}/\lambda_{em}$ ) | Stokes<br>shift<br>( $\Delta\lambda=\lambda_{em}$<br>$-\lambda_{ex}$ ) | Intensity |
| BSA                                                     | 280/345                              | 65                                                                  | 895       | 230/345                              | 115                                                                    | 989       |
| BSA+BZ <sub>1</sub>                                     | 280/362                              | 82                                                                  | 600       | 230/359                              | 129                                                                    | 628       |
| BSA+BZ <sub>2</sub>                                     | 280/363                              | 83                                                                  | 497       | 230/360                              | 130                                                                    | 537       |
| BSA+BZ <sub>3</sub>                                     | 280/364                              | 84                                                                  | 416       | 230/363                              | 133                                                                    | 509       |
| BSA+BZ <sub>4</sub>                                     | 280/364                              | 84                                                                  | 477       | 230/364                              | 134                                                                    | 467       |
| BSA+BZ <sub>5</sub>                                     | 280/364                              | 84                                                                  | 486       | 230/361                              | 131                                                                    | 518       |

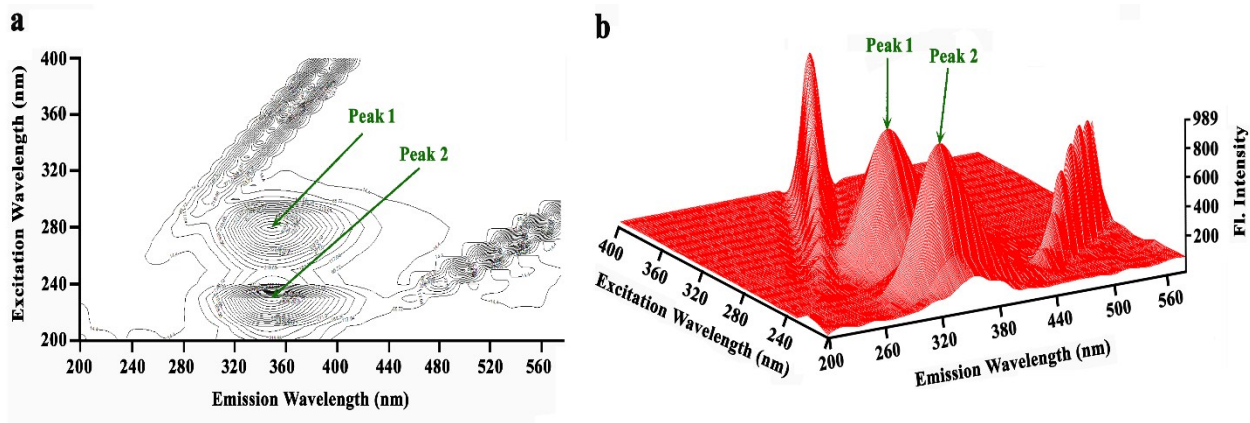

**Fig. S15** 3D fluorescence spectra of BSA with varying excitation and emission wavelength (a) contour projection and (b) surface projection.

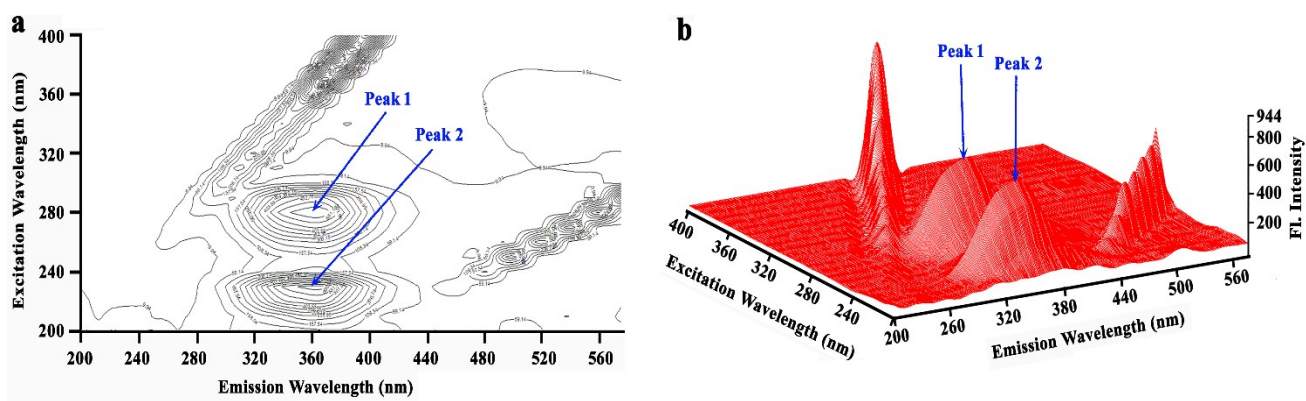

**Fig. S16** 3D fluorescence spectra of BSA + BZ<sub>1</sub> complex with varying excitation and emission wavelength (a) contour projection and (b) surface projection.



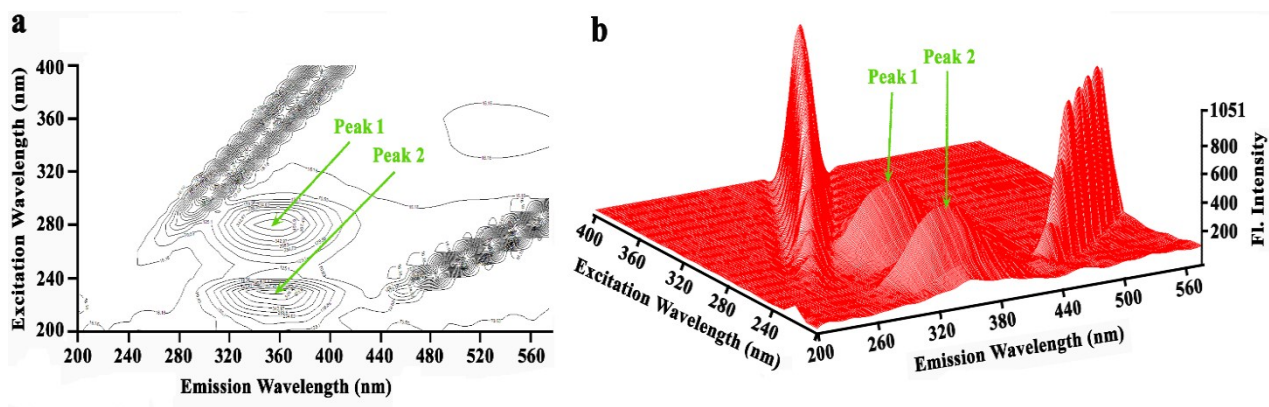

**Fig. S17** 3D fluorescence spectra of BSA + BZ<sub>2</sub> complex with varying excitation and emission wavelength (a) contour projection and (b) surface projection.

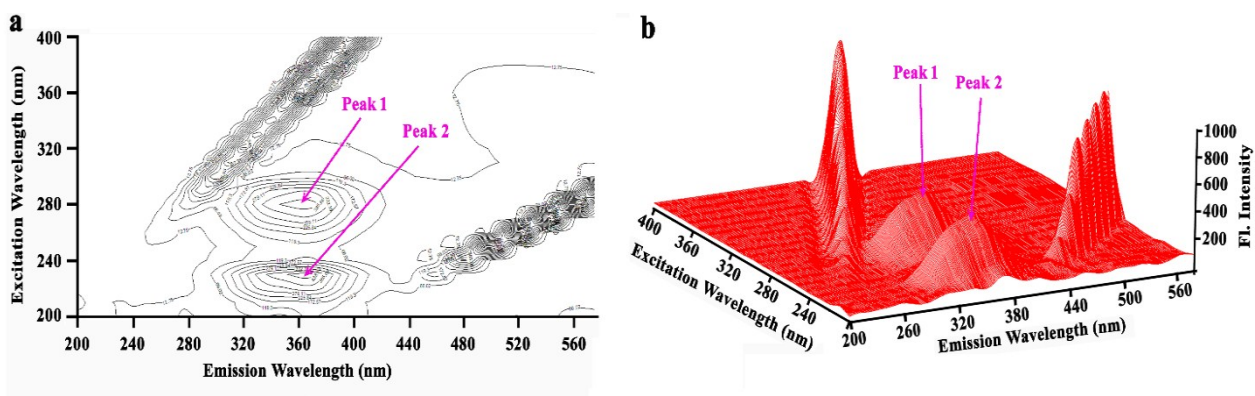

**Fig. S18** 3D fluorescence spectra of BSA + BZ<sub>3</sub> complex with varying excitation and emission wavelength (a) contour projection and (b) surface projection.

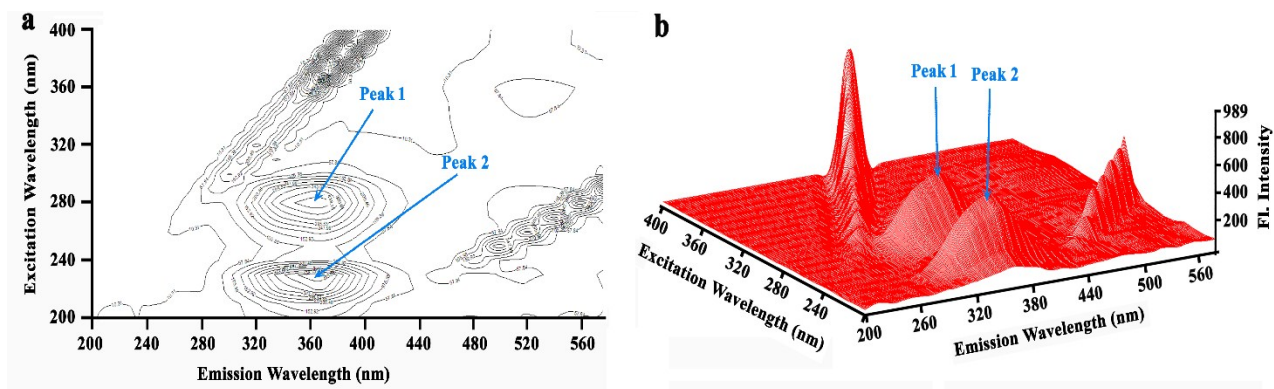

**Fig. S19** 3D fluorescence spectra of BSA + BZ<sub>4</sub> complex with varying excitation and emission wavelength (a) contour projection and (b) surface projection.

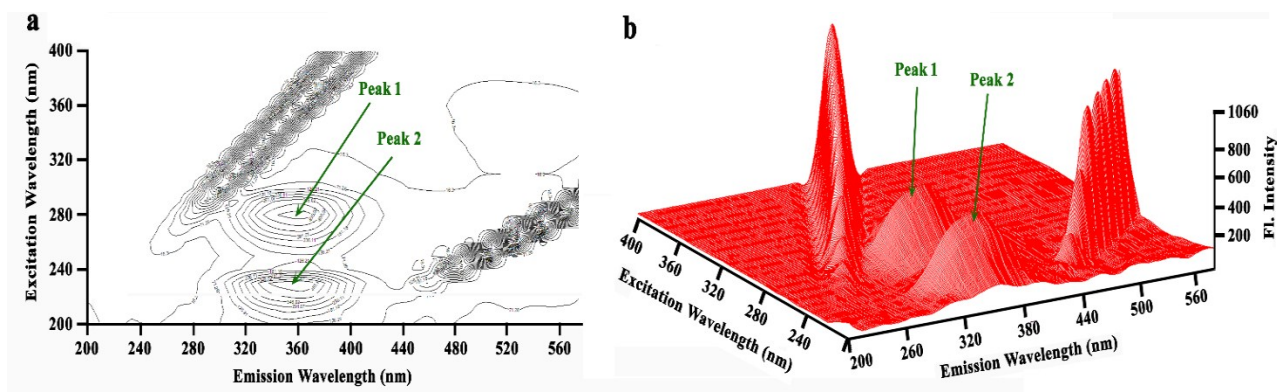

**Fig. S20** 3D fluorescence spectra of BSA + BZ<sub>5</sub> complex with varying excitation and emission wavelength (a) contour projection and (b) surface projection.

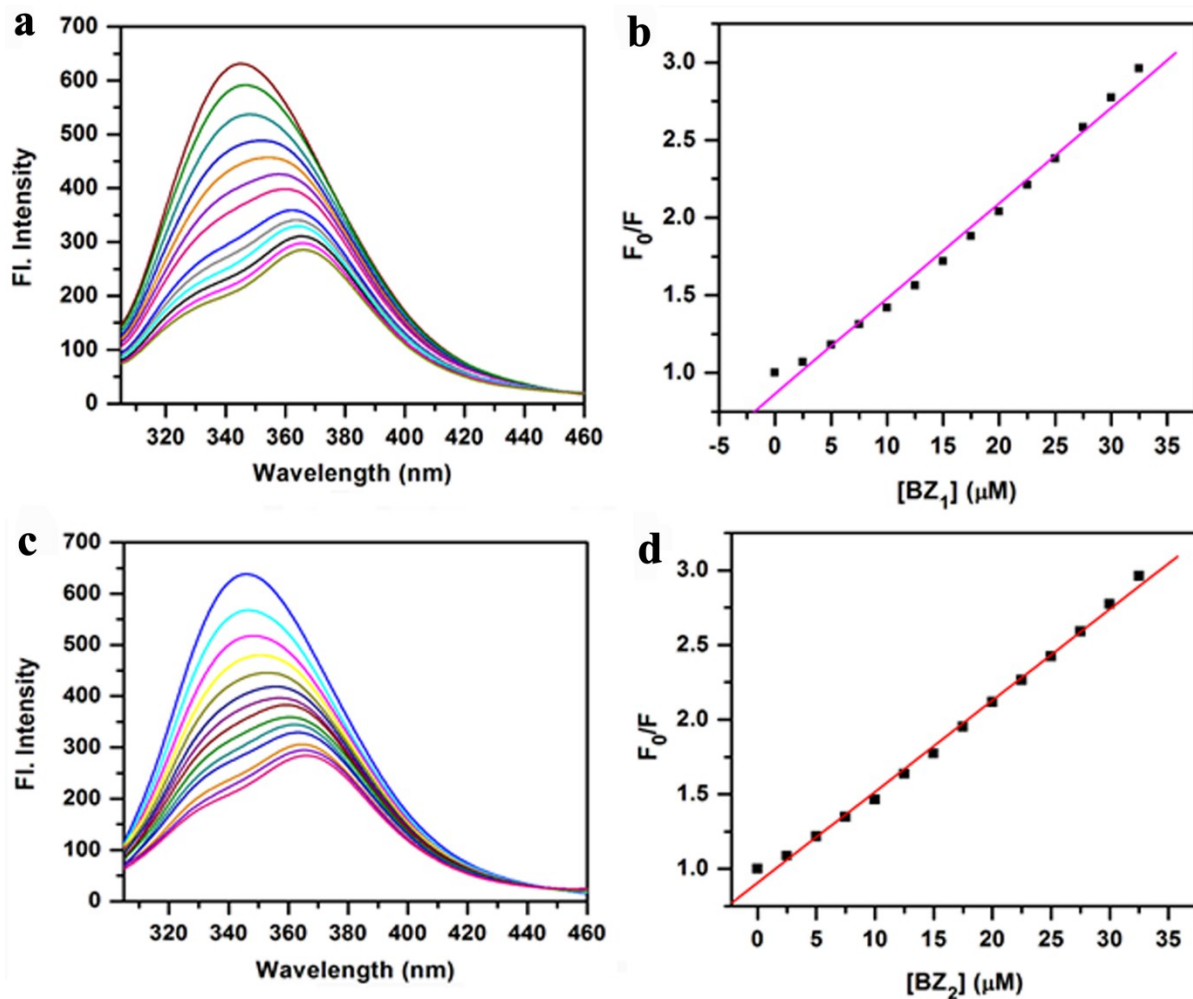

**Fig. S21** (A) Fluorescence spectra of 5  $\mu\text{M}$  BSA in the presence of increasing concentrations of probe (a) BZ<sub>1</sub> and (c) BZ<sub>2</sub> in the range from 0 to 40  $\mu\text{M}$  at pH 7.2 in 10 mM CP buffer, (B) respective Stern-Volmer plots of the BSA-ligand complex ( $F_0/F$  versus concentration of BZ<sub>1</sub> and BZ<sub>2</sub>).

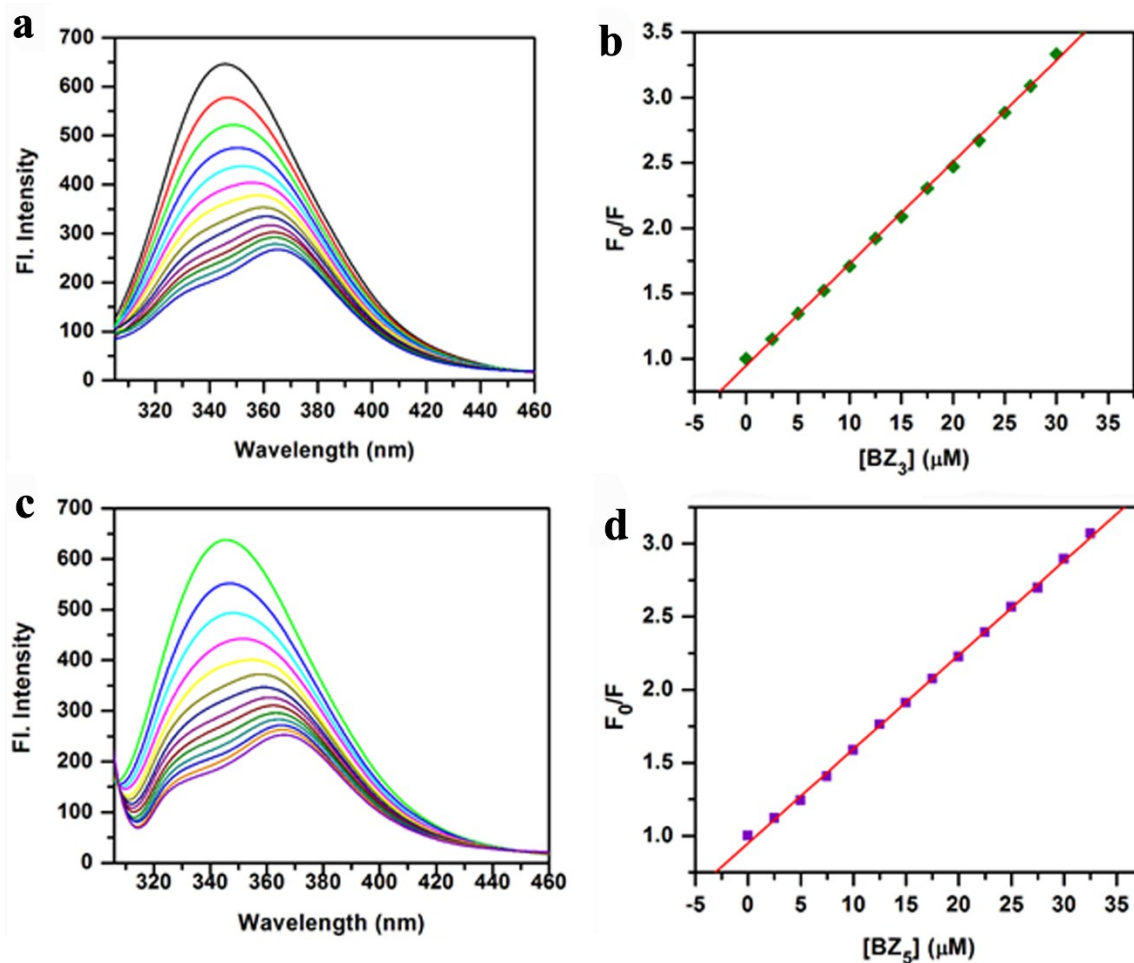

**Fig. S22** (A) Fluorescence spectra of 5  $\mu\text{M}$  BSA in the presence of increasing concentrations of probe (a) BZ<sub>3</sub> and (c) BZ<sub>5</sub> in the range from 0 to 40  $\mu\text{M}$  at pH 7.2 in 10 mM CP buffer, (B) respective Stern-Volmer plots of the BSA-ligand complex ( $F_0/F$  versus concentration of BZ<sub>3</sub> and BZ<sub>5</sub>).

| <b>Table: S6</b> Quenching parameter for various BSA- berberine analogue complexes |                         |                      |       |
|------------------------------------------------------------------------------------|-------------------------|----------------------|-------|
| Entry                                                                              | $K_{sv}^a$ ( $M^{-1}$ ) | $K_A^b$ ( $M^{-1}$ ) | $n^c$ |
| BSA + BZ <sub>1</sub>                                                              | $4.66 \times 10^4$      | $2.2 \times 10^4$    | 1.05  |
| BSA + BZ <sub>2</sub>                                                              | $5.98 \times 10^4$      | $3.1 \times 10^4$    | 1.08  |
| BSA + BZ <sub>3</sub>                                                              | $12.85 \times 10^4$     | $5.2 \times 10^4$    | 1.06  |
| BSA + BZ <sub>4</sub>                                                              | $17.47 \times 10^4$     | $5.6 \times 10^4$    | 1.04  |
| BSA + BZ <sub>5</sub>                                                              | $12.04 \times 10^4$     | $4.3 \times 10^4$    | 1.07  |

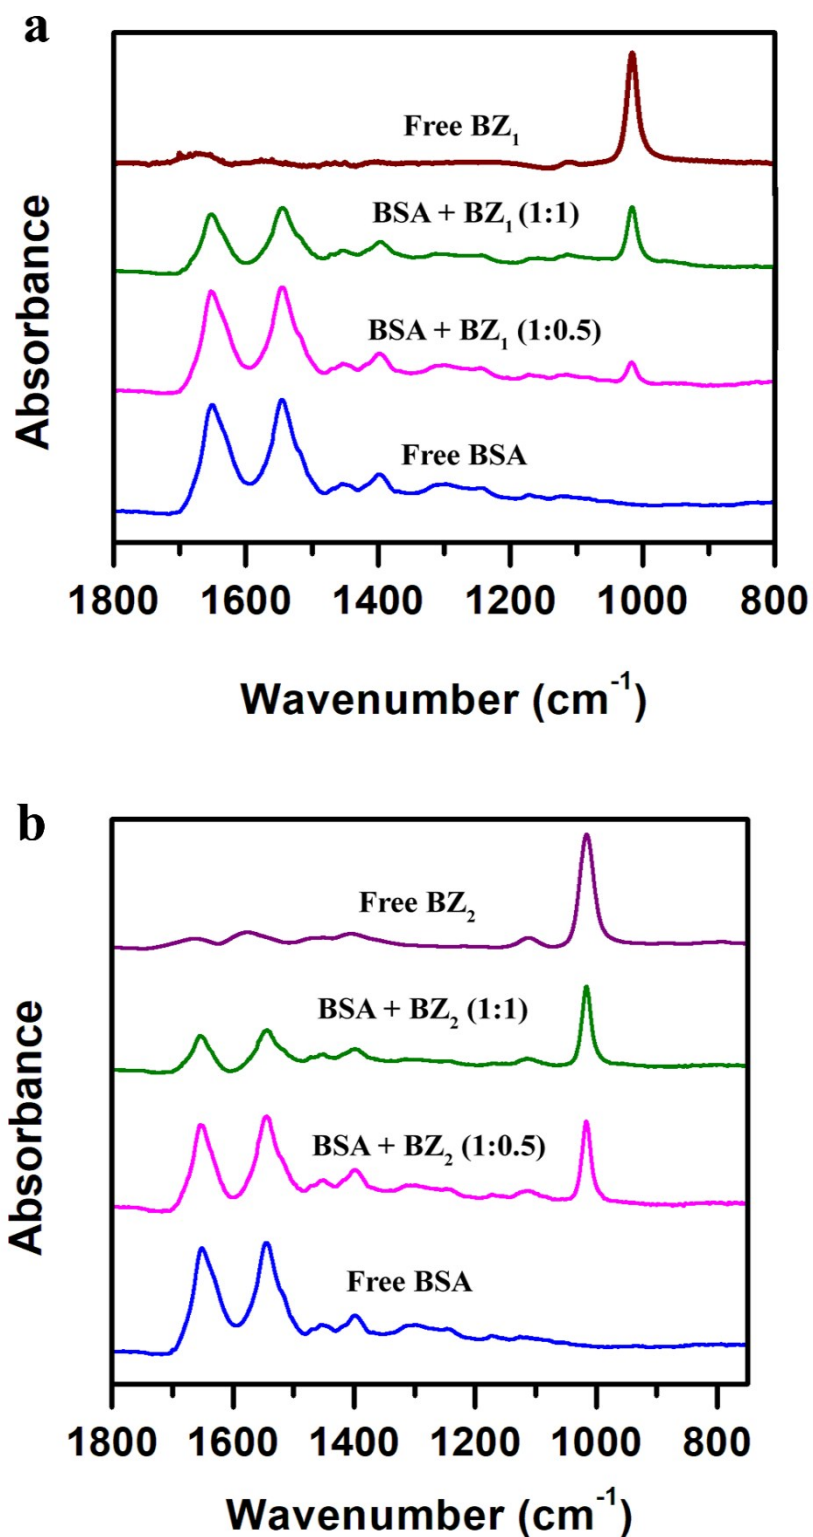

**Fig. S23** FT-IR spectra in the region of 1800 to 800 cm<sup>-1</sup> of hydrated films (at pH 7.2 in 10 mM [Na<sup>+</sup>] CP buffer, 25°C) for (a) free BSA and its complex (BSA+BZ<sub>1</sub>) at different concentrations, (b) free BSA and its complex (BSA+BZ<sub>2</sub>) at different concentrations.

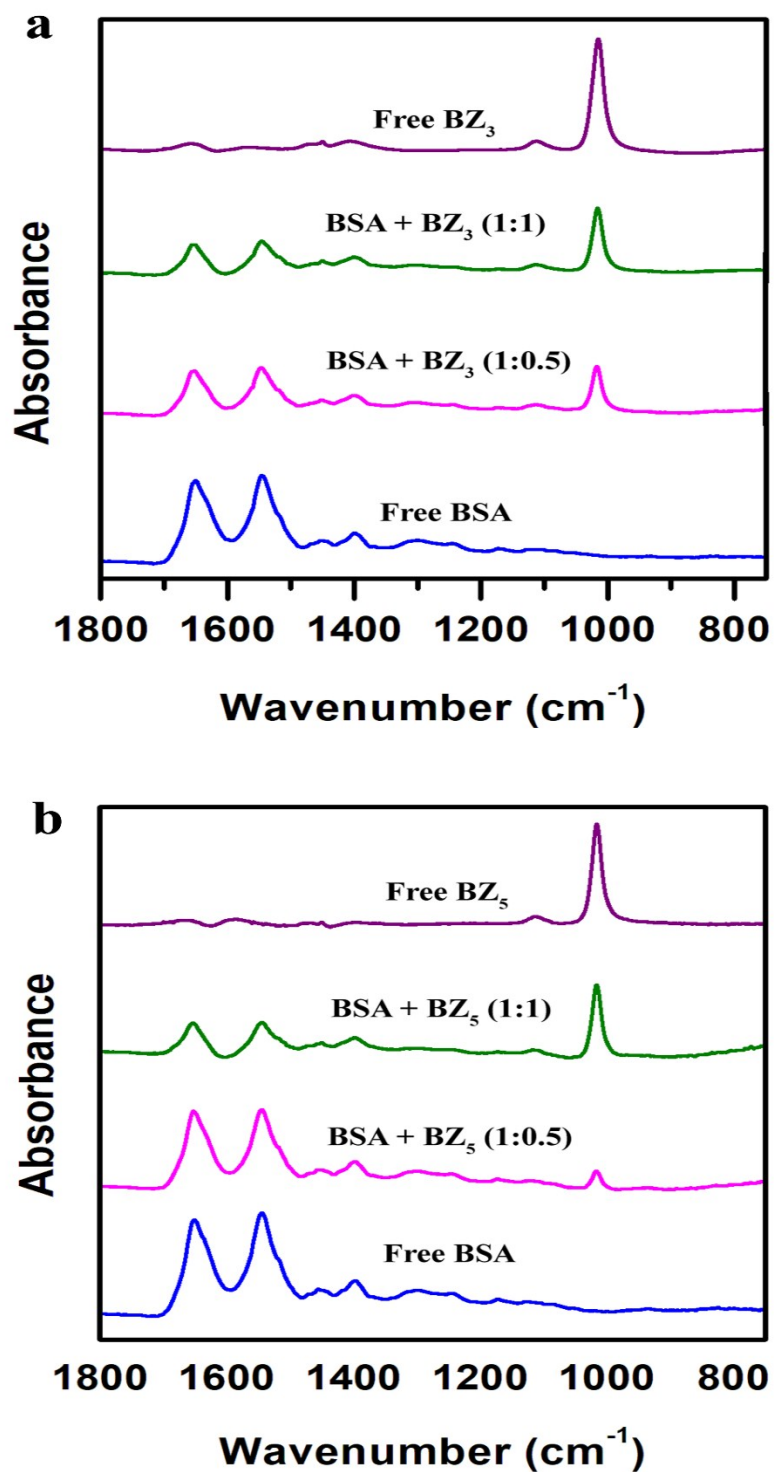

**Fig. S24** FT-IR spectra in the region of 1800 to 800  $\text{cm}^{-1}$  of hydrated films (at pH 7.2 in 10 mM  $[\text{Na}^+]$  CP buffer, 25°C) for (a) free BSA and its complex (BSA+ $\text{BZ}_3$ ) at different concentrations, (b) free BSA and its complex (BSA+ $\text{BZ}_5$ ) at different concentrations.

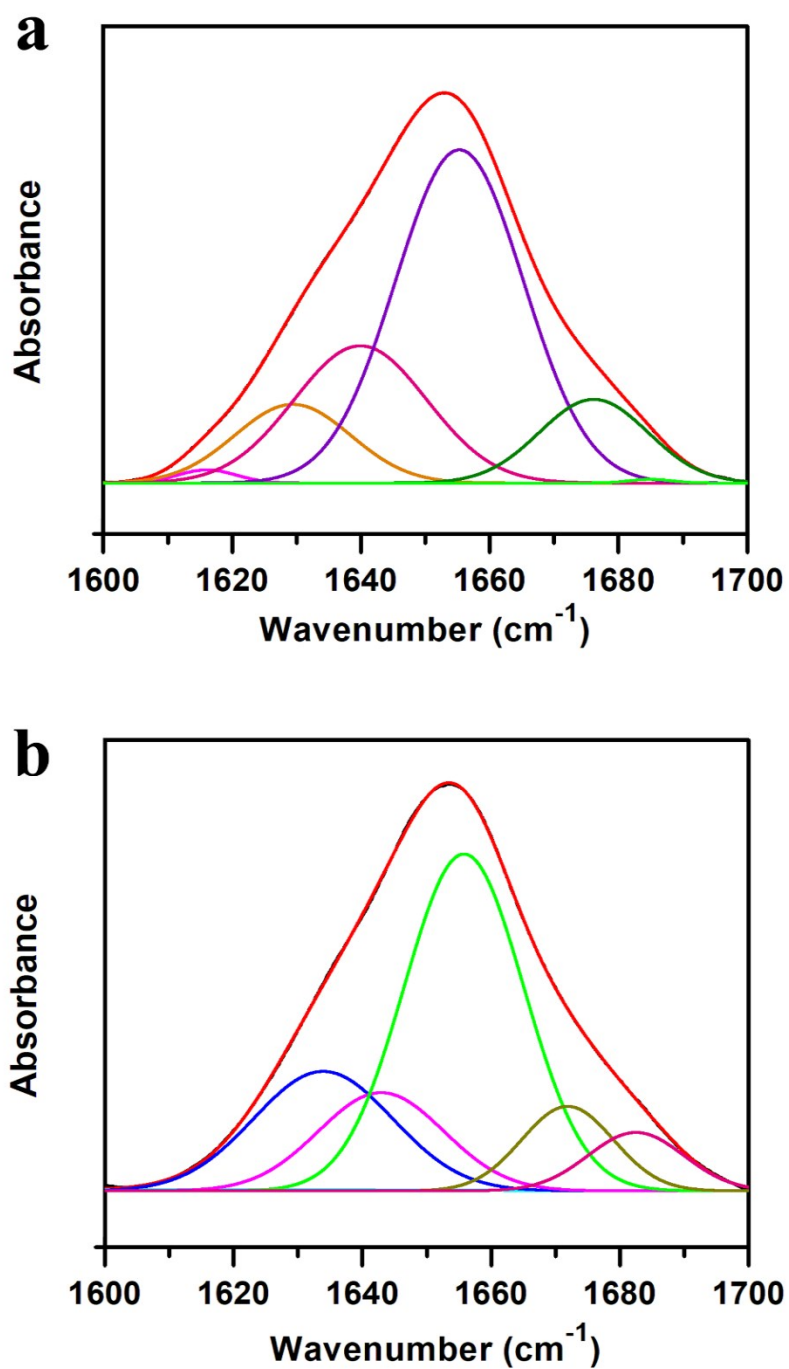

**Fig. S25** Second derivative resolution enhancement and curve-fitted amide I region (1700-1600cm<sup>-1</sup>) for (a) BSA-BZ<sub>1</sub> complex and (b) BSA-BZ<sub>2</sub> complex.



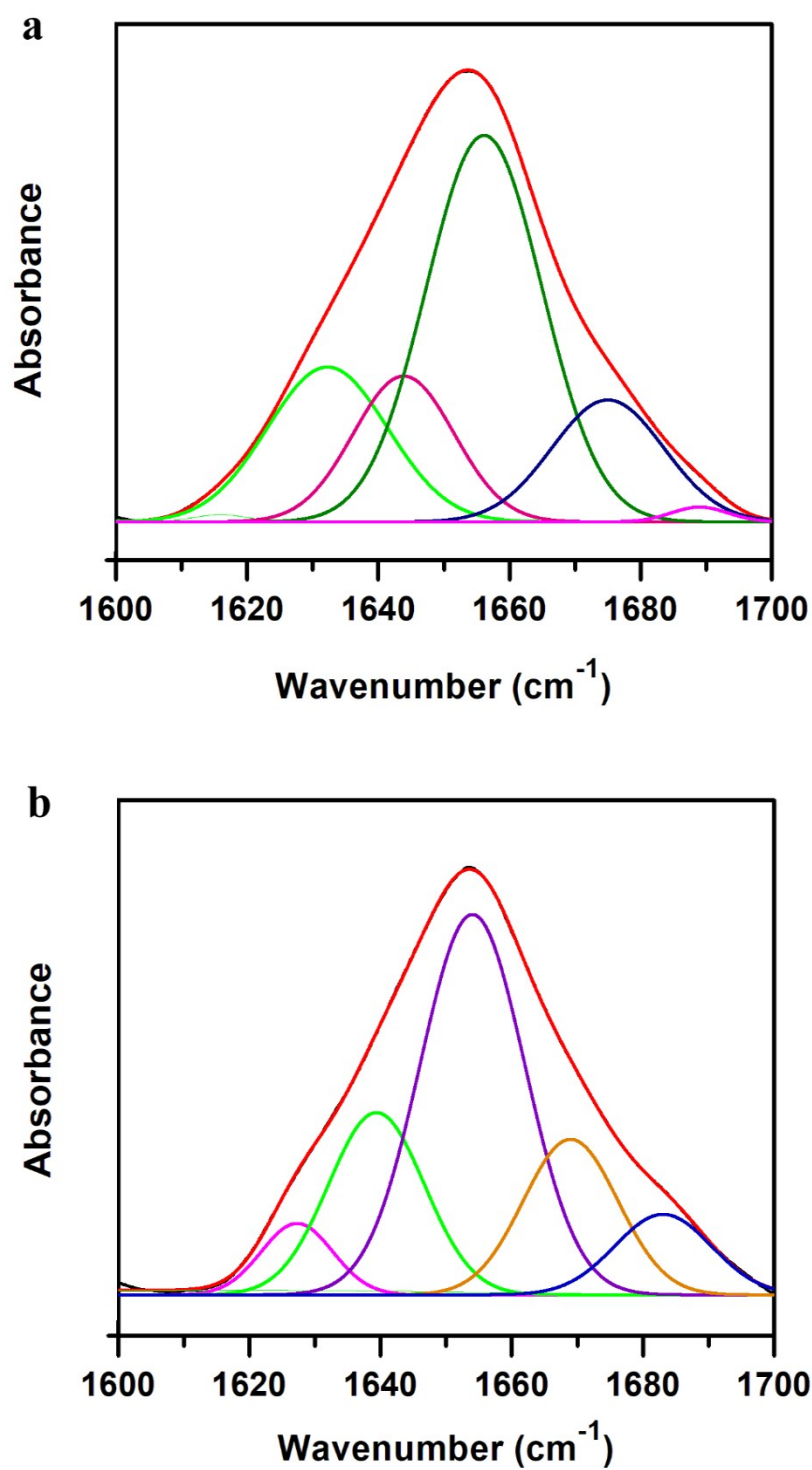

**Fig. S26** Second derivative resolution enhancement and curve-fitted amide I region (1700-1600cm<sup>-1</sup>) for (a) BSA-BZ<sub>3</sub> complex and (b) BSA-BZ<sub>5</sub> complex.

| <b>Table: S7</b> Analysis of secondary structure of free BSA and BSA-berberine analogues composite at pH 7.2 from FT-IR |          |                           |                           |                           |                           |                           |
|-------------------------------------------------------------------------------------------------------------------------|----------|---------------------------|---------------------------|---------------------------|---------------------------|---------------------------|
| Amide I components (cm <sup>-1</sup> )                                                                                  | Free BSA | BSA-BZ <sub>1</sub> (1:1) | BSA-BZ <sub>2</sub> (1:1) | BSA-BZ <sub>3</sub> (1:1) | BSA-BZ <sub>4</sub> (1:1) | BSA-BZ <sub>5</sub> (1:1) |
| β-anti (1692–1680) (±1%)                                                                                                | 4        | 1                         | 7                         | 1                         | 5                         | 7                         |
| Turn (1680–1660) (±1%)                                                                                                  | 4        | 12                        | 10                        | 13                        | 9                         | 11                        |
| α-helix (1660–1650) (±2%)                                                                                               | 55       | 53                        | 50                        | 49                        | 46                        | 47                        |
| Random coil (1648–1641) (±1%)                                                                                           | 10       | 22                        | 16                        | 17                        | 28                        | 20                        |
| β-sheet (1640–1610) (±2%)                                                                                               | 27       | 12                        | 17                        | 20                        | 12                        | 12                        |
| An average of three determination.                                                                                      |          |                           |                           |                           |                           |                           |

| <b>Table: S8</b> Molecular docking data |           |           |            |
|-----------------------------------------|-----------|-----------|------------|
| ΔG                                      | rmsd      | ΔG conf   | ΔG place   |
| -10.425905                              | 9.2527704 | 3.8795543 | -596.97272 |
| -9.4489584                              | 9.1353407 | 3.6653197 | -607.06976 |
| -9.6691275                              | 9.1338263 | 3.2104187 | -645.56812 |
| -9.7326403                              | 9.1166897 | 3.8261092 | -564.95605 |
| -9.460638                               | 9.0859594 | 3.8224683 | -569.94495 |
| -9.5036402                              | 9.0219431 | 2.8695779 | -585.07037 |
| -9.5424271                              | 8.8645029 | 3.7385738 | -552.72961 |
| -10.428071                              | 8.5361052 | 3.6117456 | -617.17285 |
| -9.6163368                              | 8.2454977 | 3.2166734 | -577.81647 |

|            |           |           |            |
|------------|-----------|-----------|------------|
| -9.3277645 | 8.2444773 | 3.8058341 | -585.25269 |
| -10.752552 | 8.0968914 | 3.5999999 | -586.26801 |
| -10.771677 | 8.0766153 | 3.6159236 | -567.97131 |
| -10.484232 | 8.0504694 | 3.2159235 | -565.67975 |
| -10.685371 | 8.0410366 | 3.2       | -558.83826 |
| -9.9006023 | 7.7852068 | 2.5597858 | -601.15149 |
| -9.8945007 | 5.8259711 | 3.2844515 | -571.46582 |
| -10.913427 | 5.37427   | 2.4564912 | -578.94708 |
| -9.7262173 | 3.8846083 | 4.3047547 | -616.93994 |
| -10.035133 | 3.8233447 | 2.6454575 | -608.02319 |
| -9.5275078 | 3.7175879 | 3.6178336 | -608.93042 |
| -9.3883715 | 3.717176  | 4.3444934 | -599.18323 |
| -10.016923 | 3.6190224 | 3.3269715 | -581.20648 |
| -9.897151  | 3.5962861 | 2.7749085 | -576.56659 |
| -9.3826494 | 3.5864789 | 3.2087717 | -598.49976 |
| -9.780385  | 3.5614181 | 3.6144423 | -576.2074  |
| -9.4827108 | 3.5467737 | 2.6482136 | -588.18158 |
| -9.5212231 | 3.4504273 | 2.6278791 | -580.32184 |
| -9.3982248 | 3.1488724 | 3.9454179 | -590.07153 |
| -9.9747019 | 3.1448007 | 2.2057986 | -554.6463  |
| -9.3491564 | 2.9691839 | 2.2       | -567.32068 |

**Characterisation of berberine analogues (1-5):**

**BZ<sub>1</sub>: 9-O-(benzyl) berberrubine (Yellowish solid, 66% yield):**

<sup>1</sup>H- NMR (400 MHz, d<sub>6</sub>-DMSO): δ 3.20 (2H, t, J= 7.5 Hz), 4.08 (3H, s), 4.92 (2H, t, J= 7.5 Hz), 5.34 (2H, s), 6.15 (2H, s), 7.09 (1H, s), 7.44 (2H, d, J= 10 Hz), 7.56 (3H, m), 7.78 (1H, s), 8.02 (1H, d, J= 10 Hz), 8.21 (1H, d, J= 10 Hz), 8.92 (1H, s), 9.8 (1H, s).

<sup>13</sup>C- NMR (100 MHz, d<sub>6</sub>-DMSO):

δ 28.8, 56.1, 58.7, 75.4, 101.2, 103.5, 110.5, 111.7, 116.7, 120.8, 123.5, 127.1, 127.6, 128.9, 131.6, 130.8, 136.7, 141.3, 146.3, 146.6, 147.1, 148.7, 149.7, 151.8.

MALDI-MS: Calc. for C<sub>26</sub>H<sub>22</sub>NO<sub>4</sub><sup>+</sup> 421.15; found 412.16

**BZ<sub>2</sub>: 9-O-(2-chlorobenzyl) berberrubine (Yellowish solid, 60% yield):**

<sup>1</sup>H- NMR (400 MHz, d<sub>6</sub>-DMSO): δ 3.18 (2H, t, J= 6 HZ), 4.02 (3H, s), 4.86 (2H, t, J= 9 HZ), 5.45 (2H, s), 6.15 (2H, s), 7.058 (1H, s), 7.67 9(1H, d, J= 12 HZ), 7.77 (1H, d, J= 12 HZ), 8.06 (1H, d, J= 12 HZ), 8.20 (1H, s), 8.78 (1H, s), 9.82 (1H, s).

<sup>13</sup>C- NMR (100 MHz, d<sub>6</sub>-DMSO):

δ 28.8, 56.1, 58.7, 67.4, 101.2, 103.5, 110.5, 111.7, 116.7, 120.8, 123.5, 127, 128.5, 129, 130.7, 131.6, 130.8, 134, 141.3, 146.3, 146.6, 147.1, 148.7, 149.7, 151.8.

MALDI-MS: Calc. for C<sub>26</sub>H<sub>21</sub>ClNO<sub>4</sub><sup>+</sup> 446.12; found 446.24

**BZ<sub>3</sub>: 9-O-(3-chlorobenzyl) berberrubine (Yellowish solid, 62% yield):**

<sup>1</sup>H- NMR (400 MHz, d<sub>6</sub>-DMSO): δ 3.20 (2H, t, J= 6 HZ), 4.08 (3H, s), 4.92 (2H, t, J= 9 HZ), 5.34 (2H, s), 6.17 (2H, s), 7.09 (1H, s), 7.44 (1H, d, J= 12 HZ), (2H, m), 7.71 (1H, s), 7.78 (1H, s), 8.04 (1H, d, J= 12 HZ), 8.21 (1H, d, J= 12 HZ), 8.92 (1H, s), 9.80 (1H, s).

<sup>13</sup>C- NMR (100 MHz, d<sub>6</sub>-DMSO):

δ 28.8, 56.1, 58.7, 70.9, 101.2, 103.5, 110.5, 111.7, 116.7, 120.8, 123.5, 125.2, 126.9, 127.7, 130.3, 130.8, 131.6, 134.5, 141.3, 142.6, 146.3, 146.6, 147.1, 148.7, 149.7, 151.8.

MALDI-MS: Calc. for C<sub>26</sub>H<sub>21</sub>ClNO<sub>4</sub><sup>+</sup> 446.12; found 446.25

**BZ<sub>4</sub>: 9-O-(4-chlorobenzyl) berberrubine (Yellowish solid, 65% yield):**

<sup>1</sup>H- NMR (400 MHz, d<sub>6</sub>-DMSO): δ 3.19 (2H, t, J= 10 HZ), 4.04 (3H, s), 4.90 (2H, t, J= 7.5 HZ), 5.40 (2H, s), 6.16 (2H, s), 7.08 (1H, s), 7.51 (1H, d, J= 5 HZ), 7.56 (2H, d, J= 10 HZ), 7.78 (1H, s), 8.07 (1H, d, J= 10 HZ), 8.21 (1H, d, J= 10 HZ), 8.92 (1H, s), 9.78 (1H, s).

<sup>13</sup>C- NMR (100 MHz, d<sub>6</sub>-DMSO):

δ 28.8, 56.1, 58.7, 75.4, 101.2, 103.5, 110.5, 111.7, 116.7, 120.8, 123.5, 129.0, 129.7, 130.8, 131.6, 133.2, 134.8, 141.3, 146.3, 146.6, 147.1, 148.7, 149.7, 151.8.

MALDI-MS: Calc. for C<sub>26</sub>H<sub>21</sub>ClNO<sub>4</sub><sup>+</sup> 446.12; found 446.15

**BZ<sub>5</sub>: 9-O-(2, 5-dichlorobenzyl) berberrubine (Yellowish solid, 58% yield):**

<sup>1</sup>H- NMR (400 MHz, d<sub>6</sub>-DMSO): δ 3.19 (2H, t, J= 12 HZ), 4.04 (3H, s), 4.90 (2H, t, J= 9 HZ), 5.40 (2H, s), 6.16 (2H, s), 7.03 (1H, s), 7.33 (1H, d, J= 6 HZ), 7.51(1H, s), 7.72 (1H, d, J= 6 HZ), 7.78 (1H, s), 8.07 (1H, d, J= 12 HZ), 8.21 (1H, d, J= 12 HZ), 8.92 (1H, s), 9.78 (1H, s).

<sup>13</sup>C- NMR (100 MHz, d<sub>6</sub>-DMSO):

δ 28.8, 56.1, 58.7, 66.9, 101.2, 103.5, 110.5, 111.7, 116.7, 120.8, 123.5, 128.3, 128.8, 129.1, 130.4, 130.8, 131.6, , 132.6, 136.7, 139.6, 141.3, 146.3, 146.6, 147.1, 148.7, 149.7, 151.8.

MALDI-MS: Calc. for C<sub>26</sub>H<sub>20</sub>Cl<sub>2</sub>NO<sub>4</sub><sup>+</sup>480.08; found 480.22

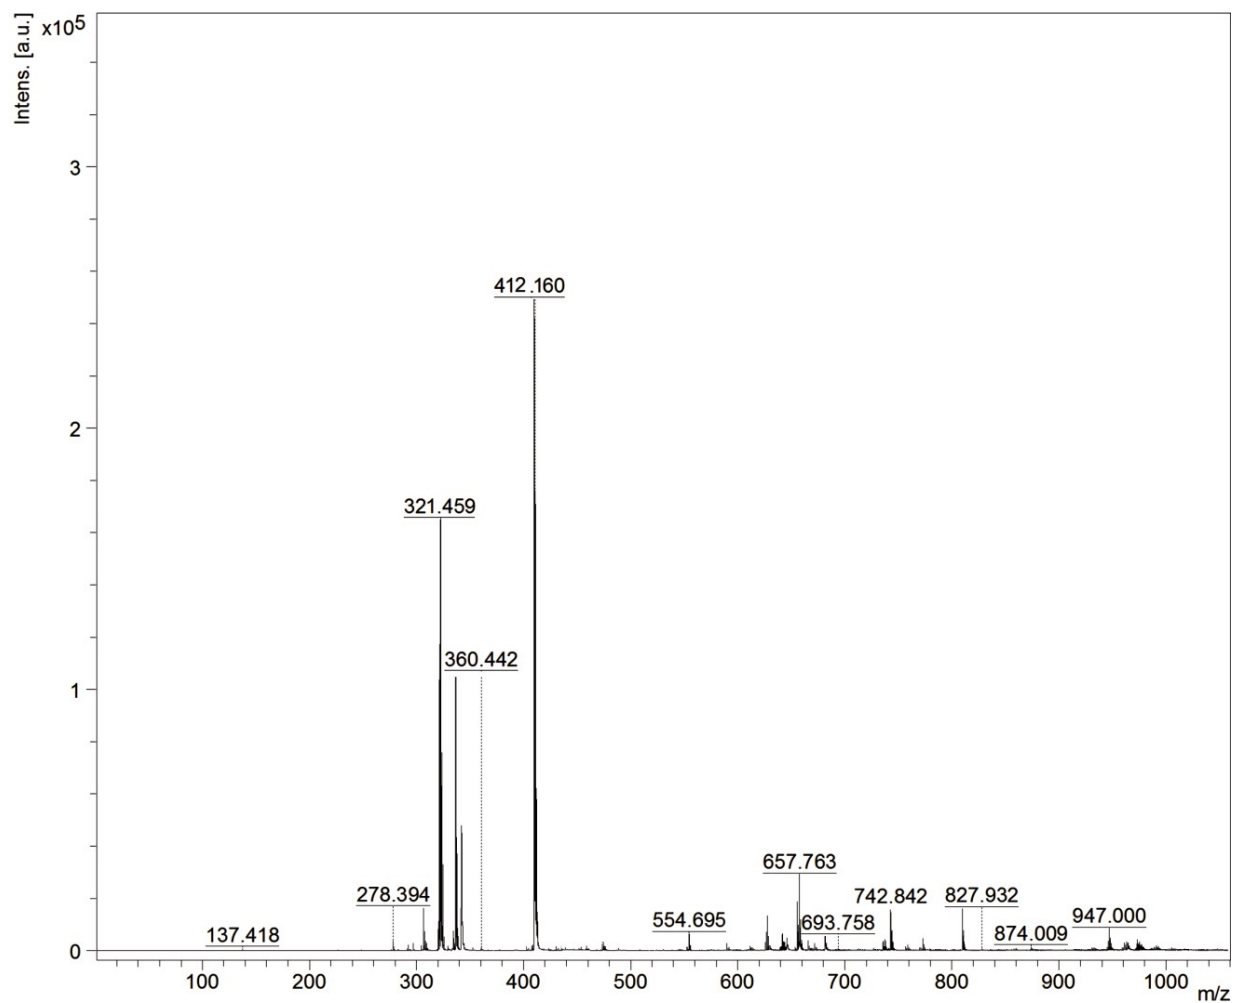

**Fig. S27** MALDI-MS spectra of BZ<sub>1</sub>

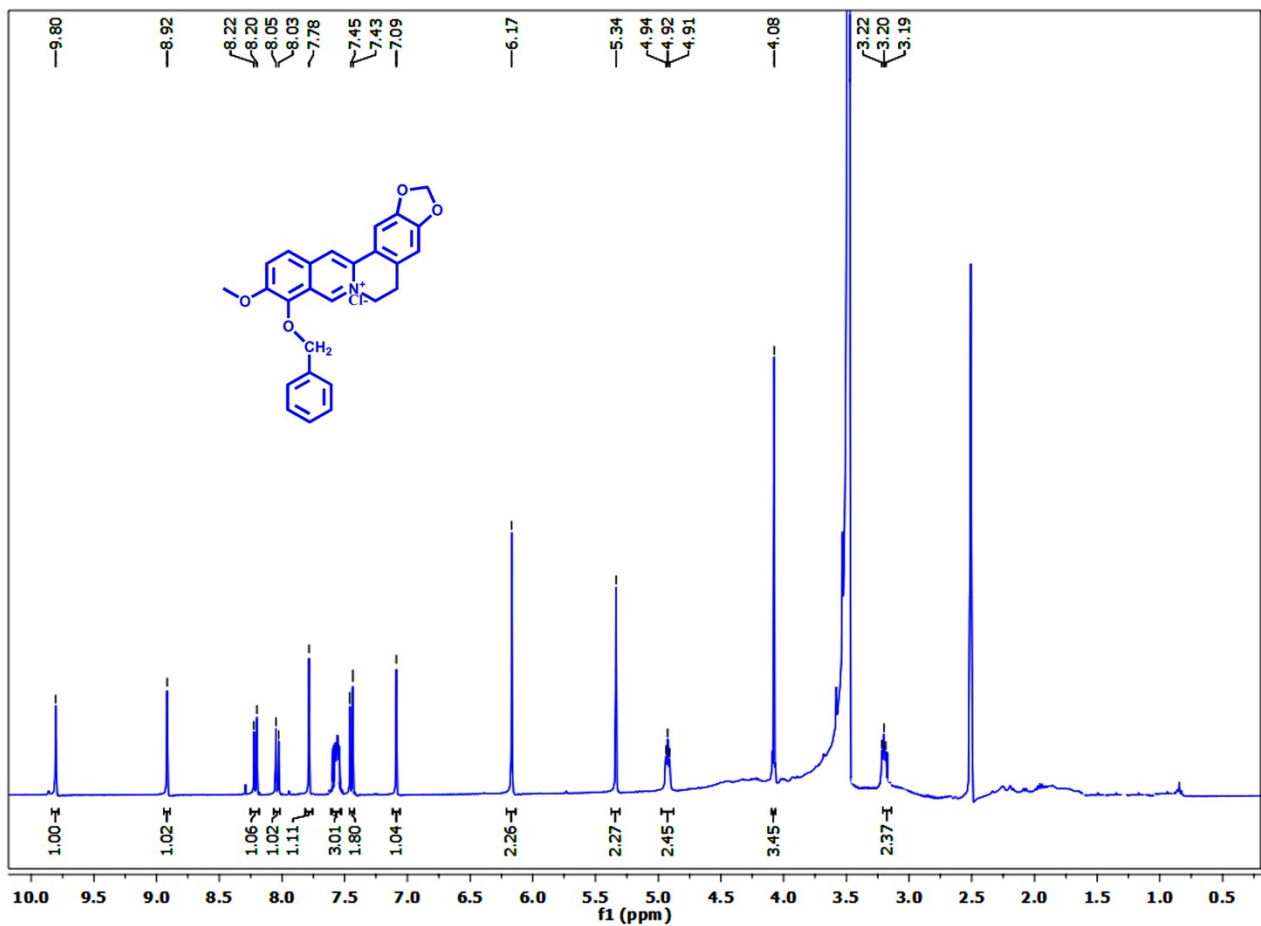

Fig. S28 <sup>1</sup>H NMR spectra of BZ<sub>1</sub> in d<sub>6</sub>-DMSO.



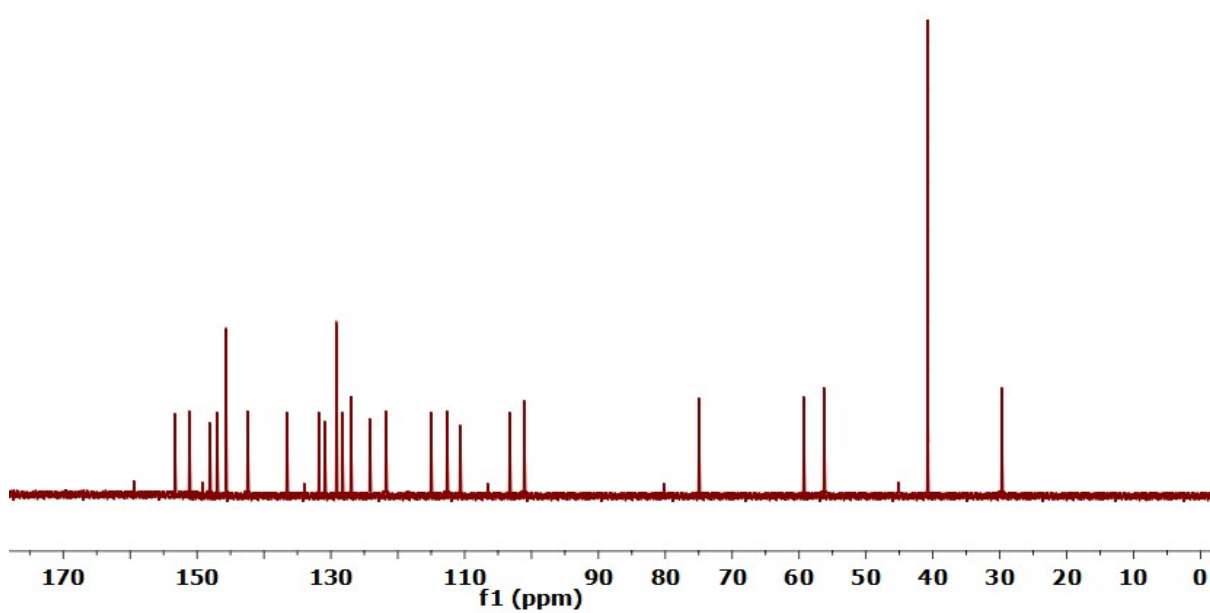

**Fig. S29**  $^{13}\text{C}$  NMR spectra of  $\text{BZ}_1$  in  $\text{d}_6\text{-DMSO}$ .

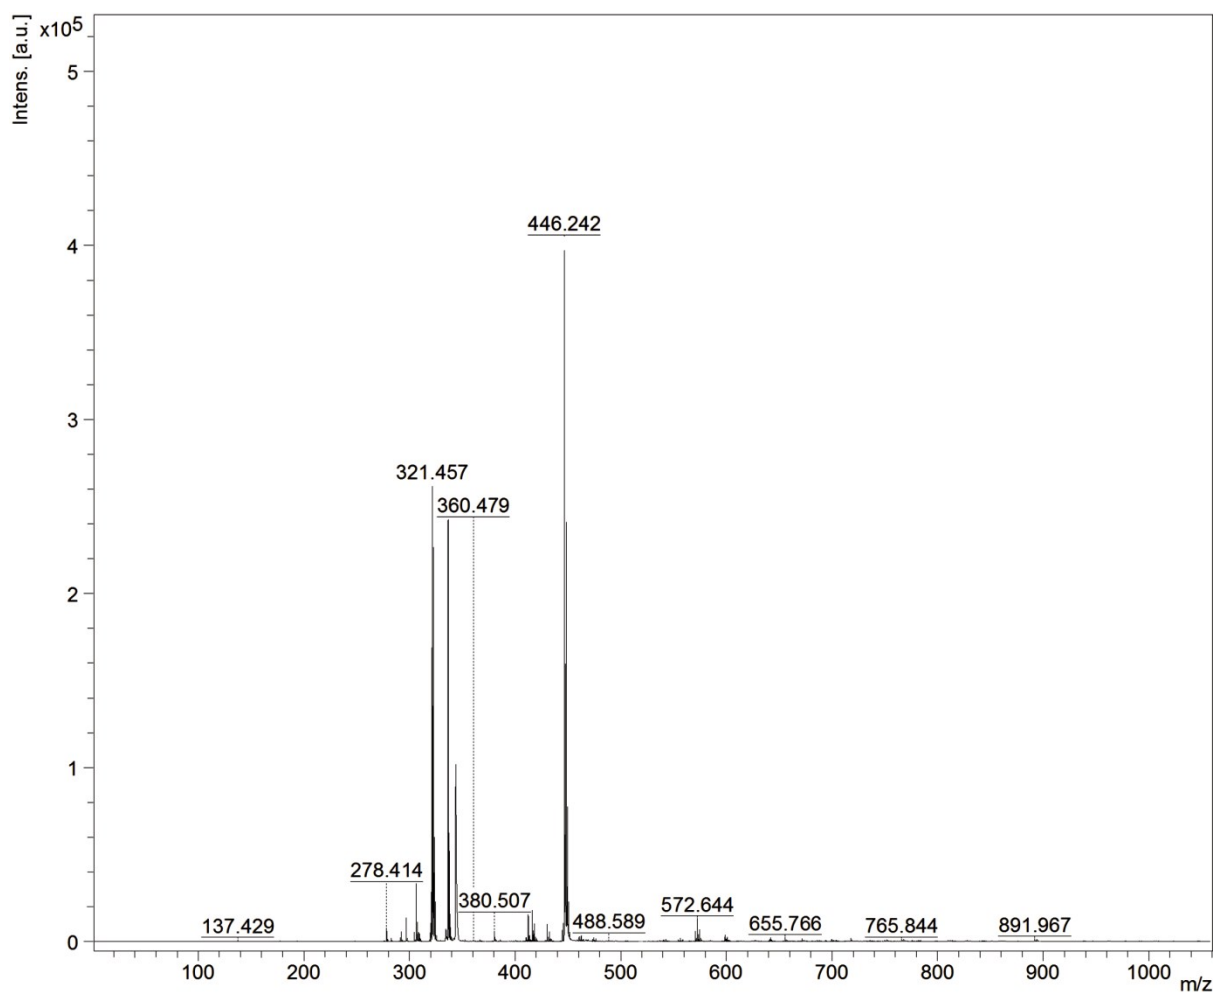

**Fig. S30** MALDI-MS spectra of  $\text{BZ}_2$

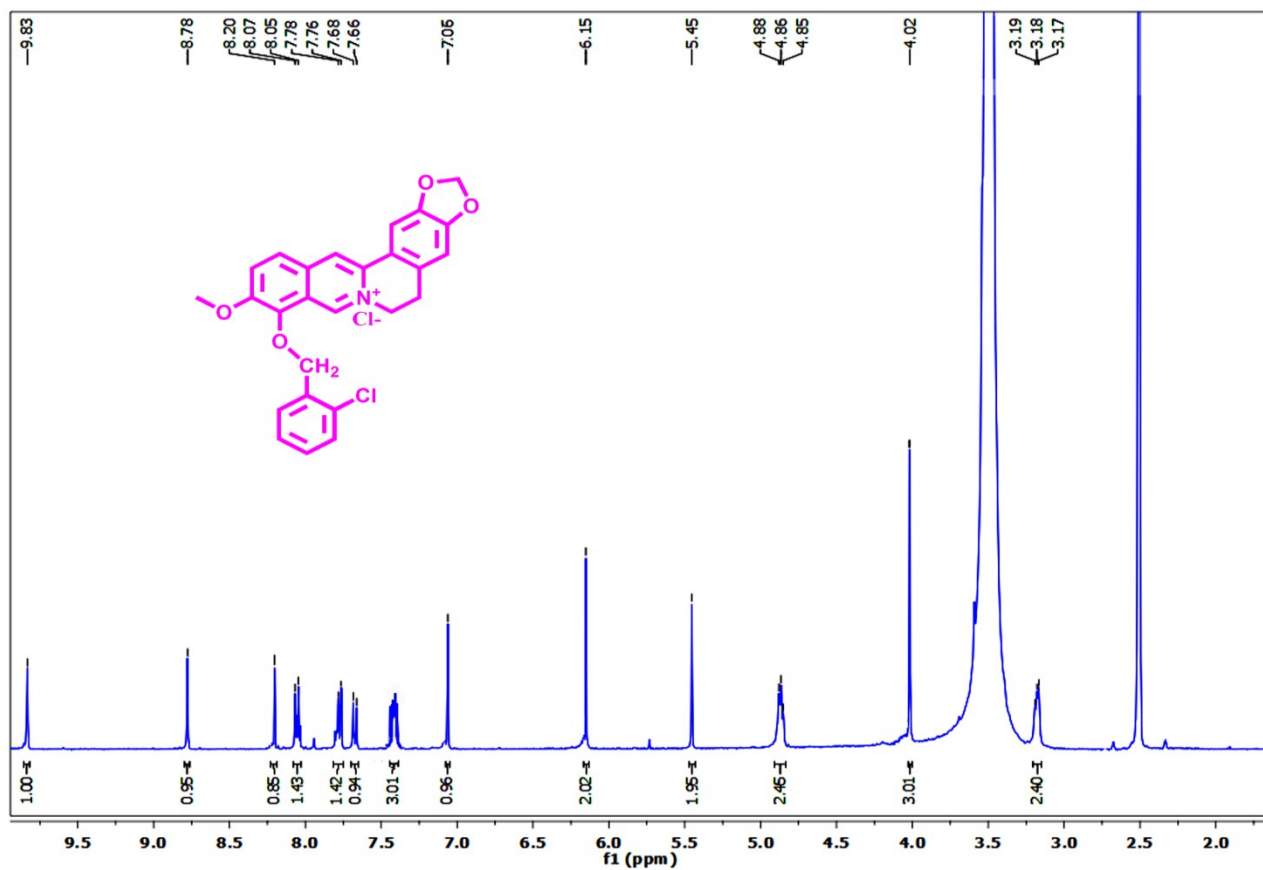

Fig. S31 <sup>1</sup>H NMR spectra of BZ<sub>2</sub> in d<sub>6</sub>-DMSO

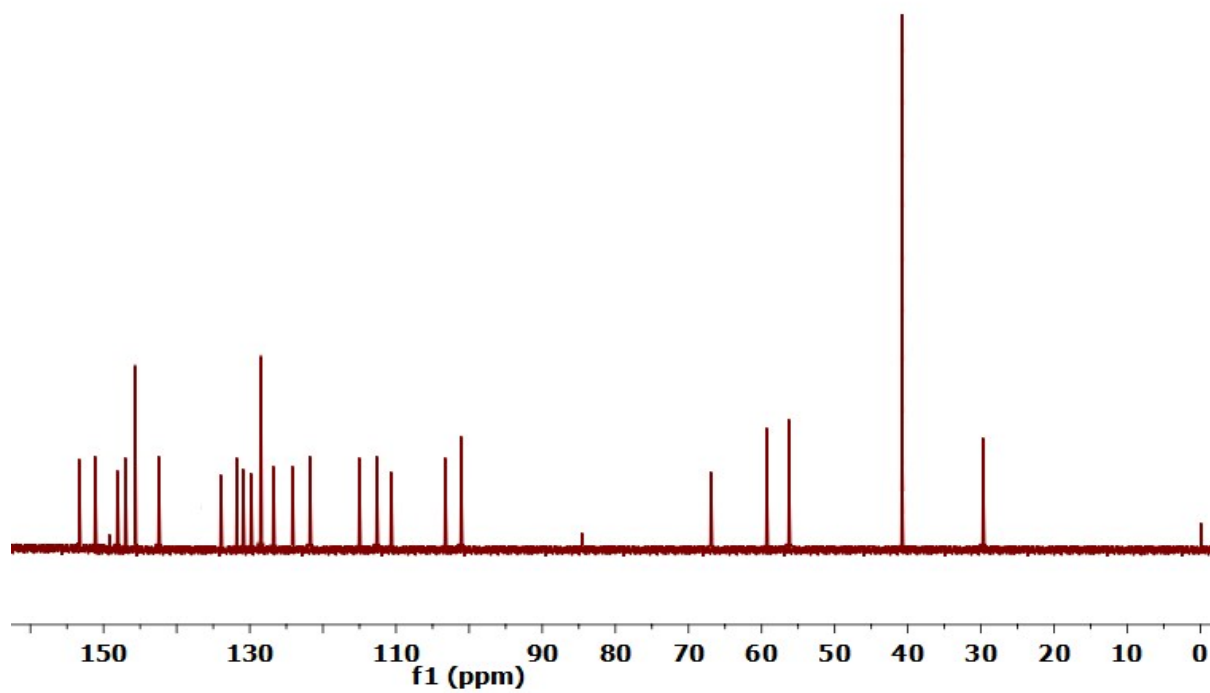

Fig. S32 <sup>13</sup>C NMR spectra of BZ<sub>2</sub> in d<sub>6</sub>-DMSO

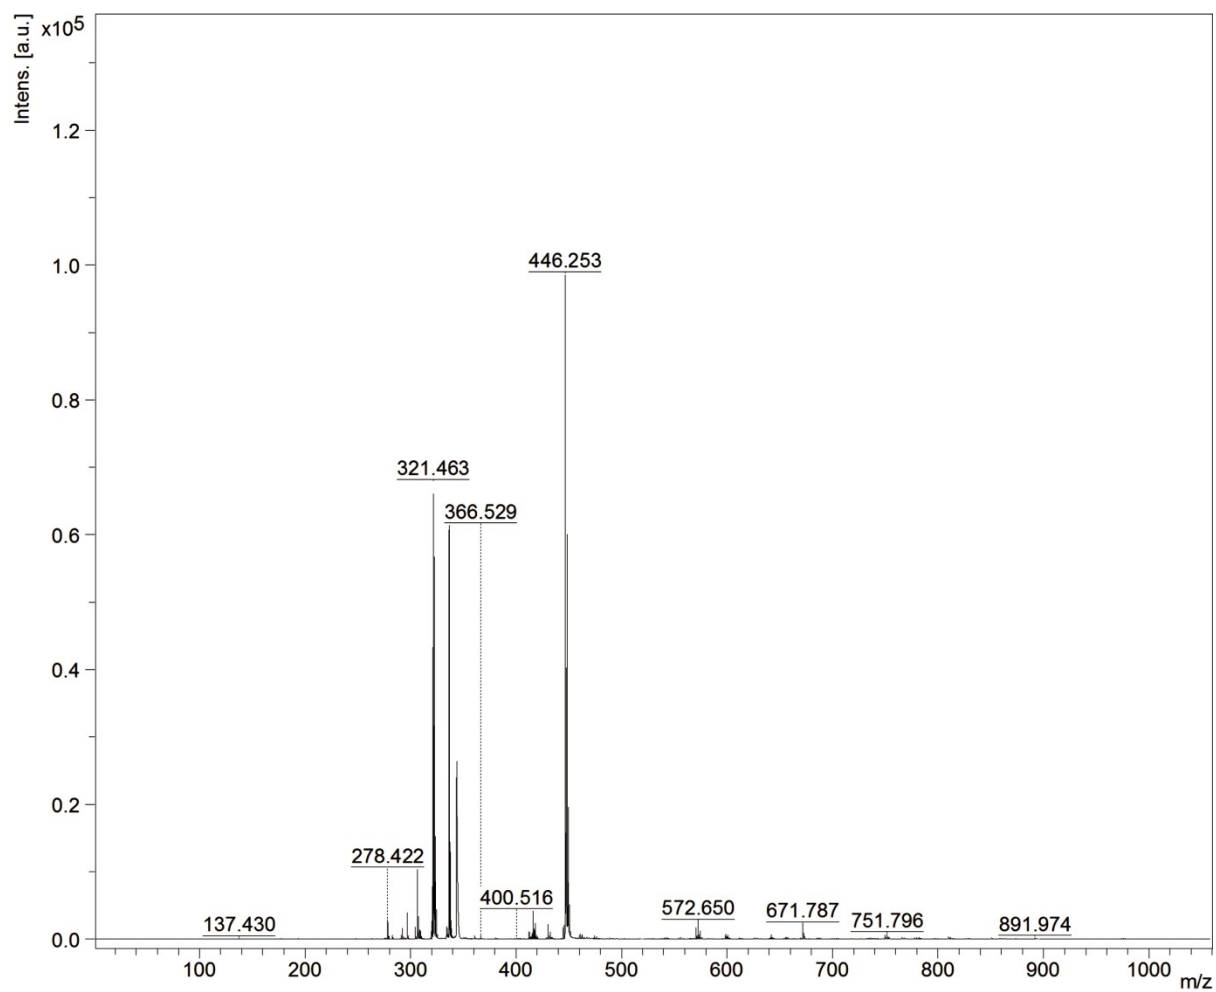

**Fig. S33** MALDI-MS spectra of BZ<sub>3</sub>

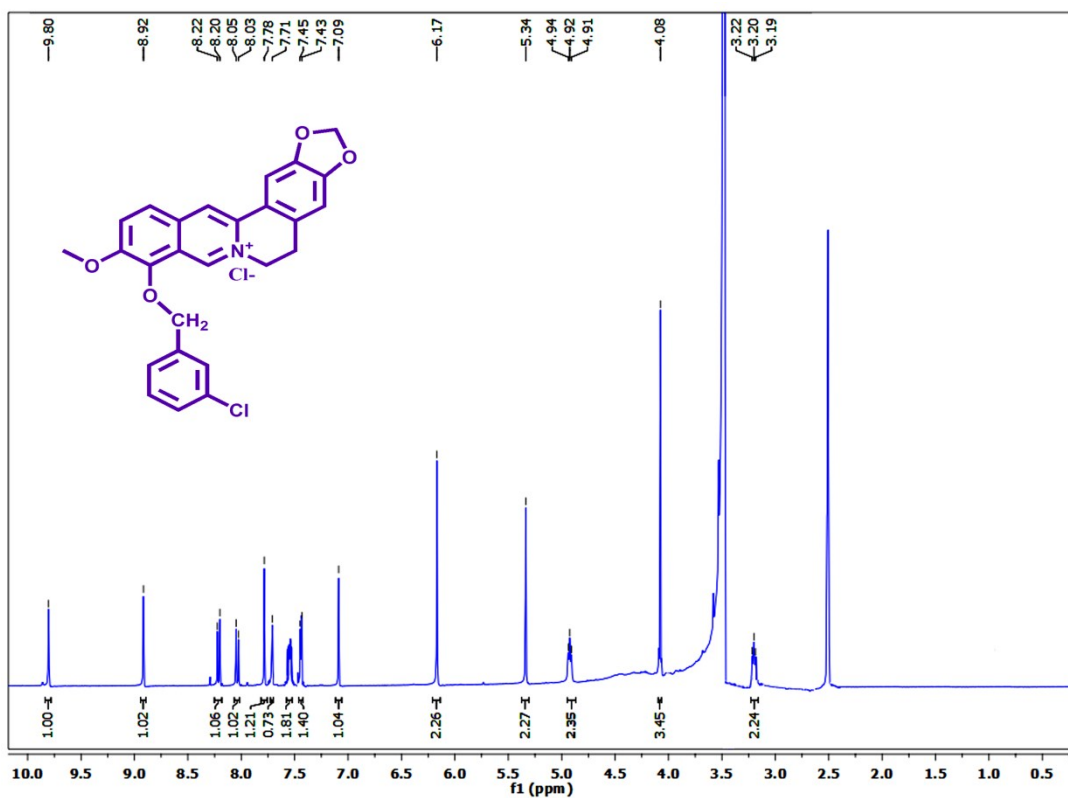

Fig. S34 <sup>1</sup>H NMR spectra of BZ<sub>3</sub> in d<sub>6</sub>-DMSO

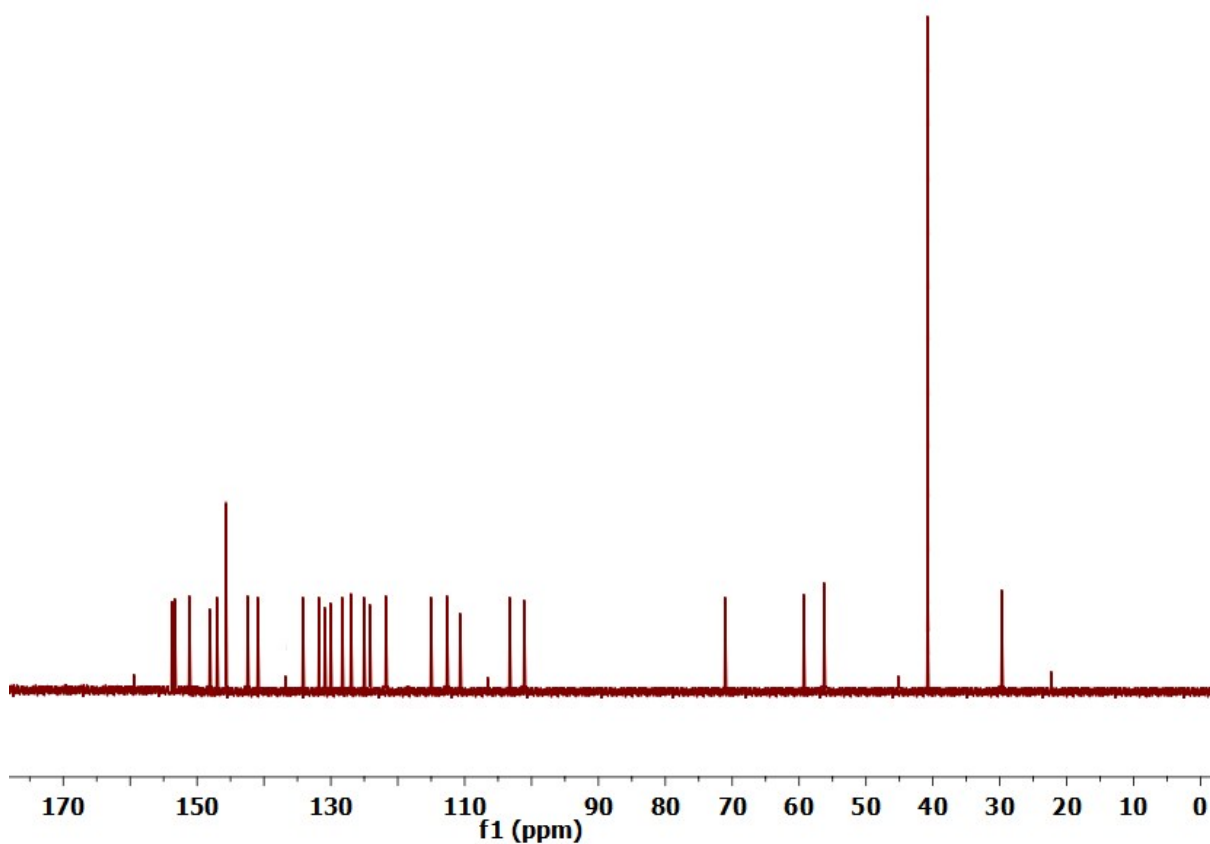

Fig. S35 <sup>13</sup>C NMR spectra of BZ<sub>3</sub> in d<sub>6</sub>-DMSO

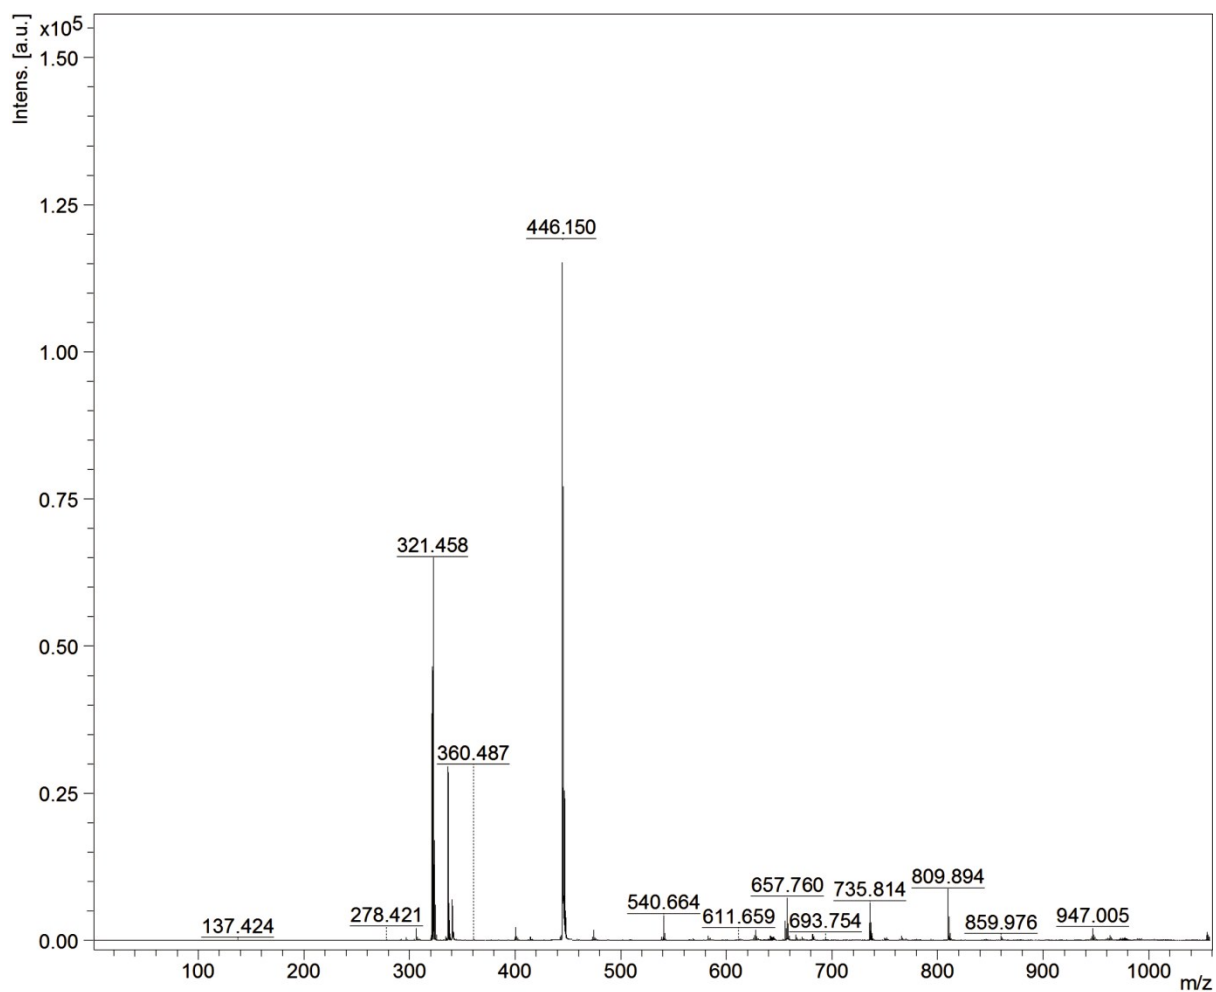

**Fig. S36** MALDI-MS spectra of BZ<sub>4</sub>

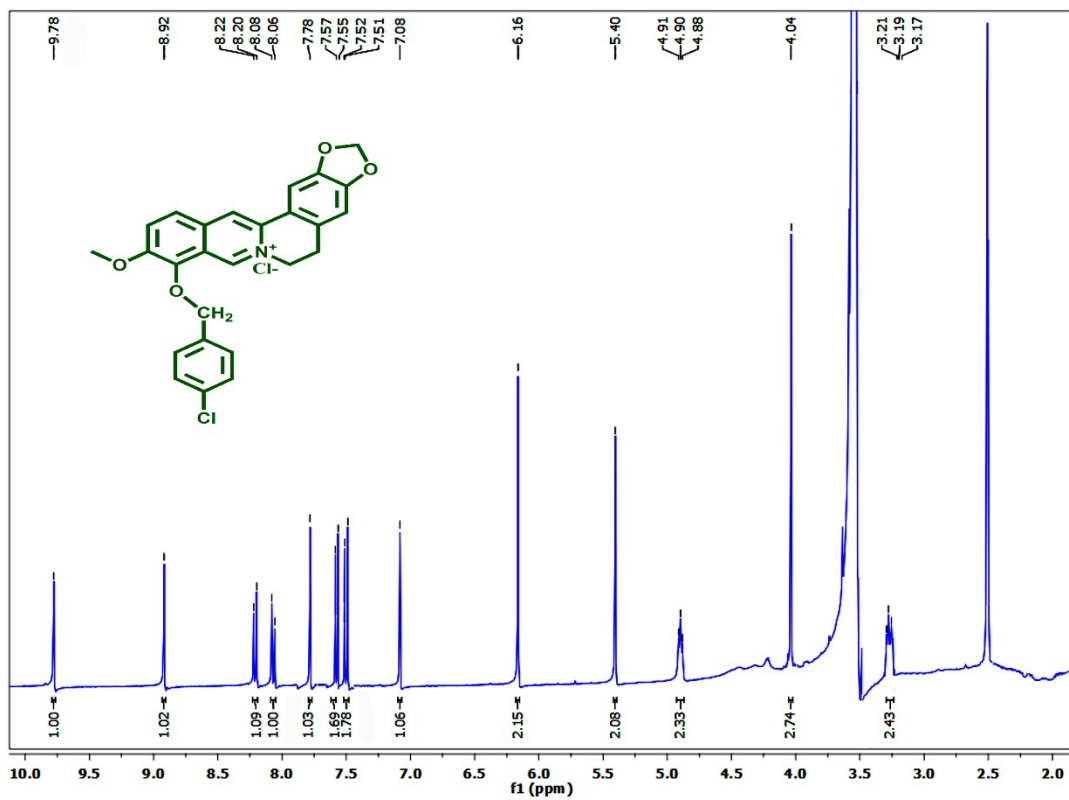

Fig. S37 <sup>1</sup>H NMR spectra of BZ<sub>4</sub> in d<sub>6</sub>-DMSO

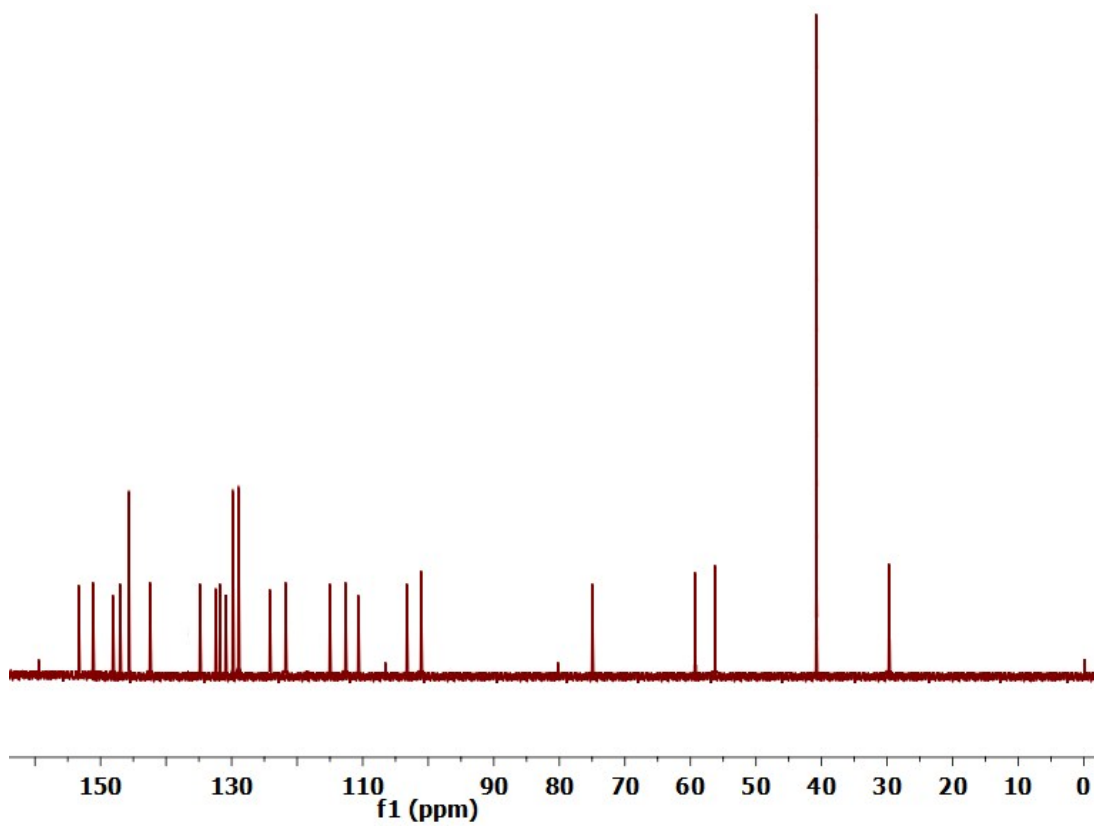

Fig. S38 <sup>13</sup>C NMR spectra of BZ<sub>4</sub> in d<sub>6</sub>-DMSO.

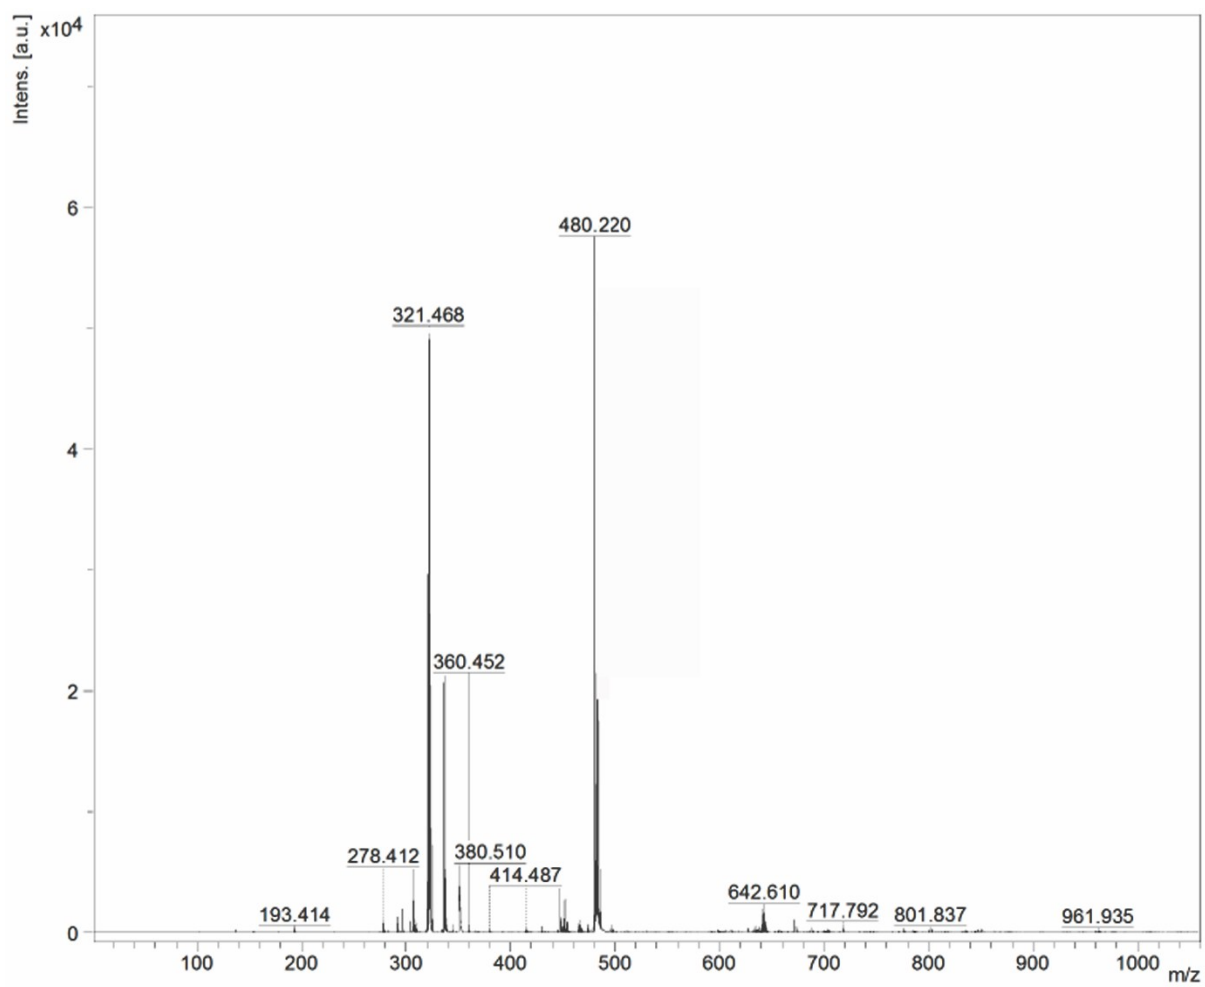

**Fig. S39** MALDI-MS spectra of BZ<sub>5</sub>

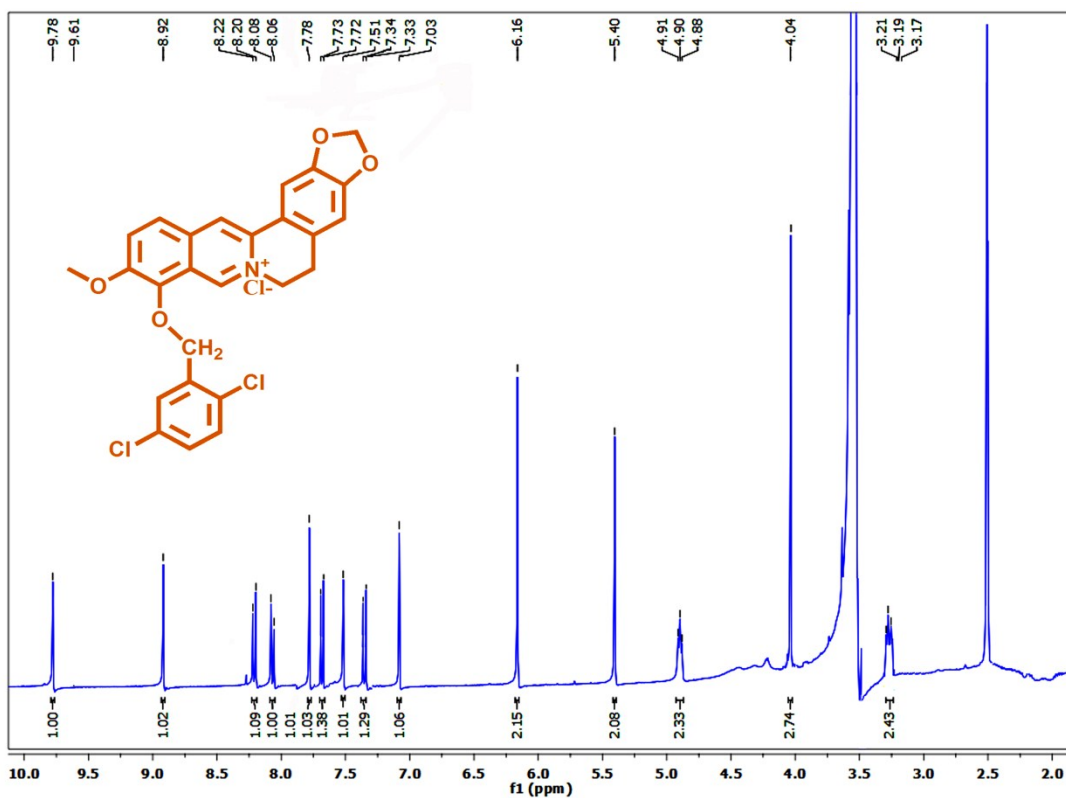

Fig. S40 <sup>1</sup>H NMR spectra of BZ<sub>5</sub> in d<sub>6</sub>-DMSO

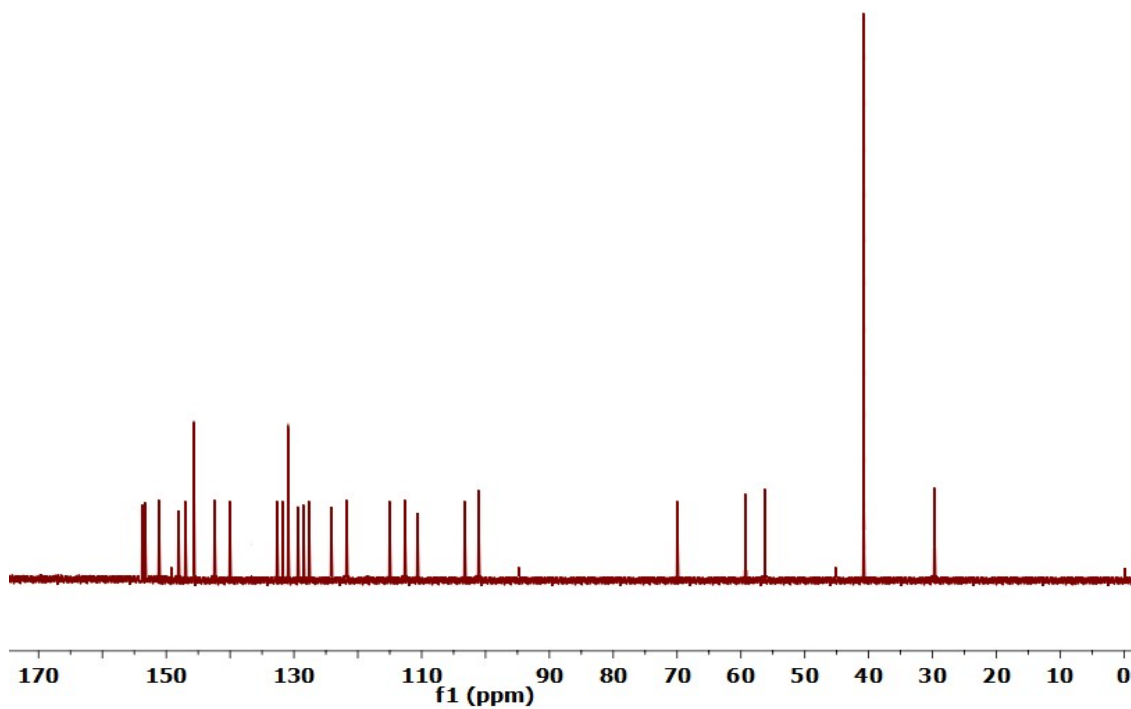

Fig. S41 <sup>13</sup>C NMR spectra of BZ<sub>5</sub> in d<sub>6</sub>-DMSO.
